# Supplementary material for: The Time Value of Carbon Storage
Source: Research Square preprint supplement (doi:10.21203/rs.3.rs-1455865/v1), 2022-03-16
Supplement: Supplementary file 2 [file 5ea24cd5c0f87dc8d094287f.xlsx]

## Sheet: SCC=20.50; constant; r=5%
	discount rate	0.05
	SCC growth rate	0		N with formula	20.5042
	Net discount rate	0.05
	Initial carbon Price	20.5042
	Initial carbon rent	1
				Delay years (τ)	1
	Instant release			Delay τ years
	ton years (year 0-100)	53.0661		ton years (year 0-100)	52.6566
	Discounted Emission Value (year 0-100)	13.6969		Discounted Emission Value (year 0-100)	13.0263
	100d1 value (C8-F8)	0.67063		N 100d (C8/C9)	20.4239
	Discounted Emission Value (year 0-1000)	13.7487		Discounted Emission Value (year 0-1000)	13.0782
	1000d1 value	0.670532		N 1000d	20.5042
	Scenario 1	Scenario 2		Scenario 3	Scenario 4			-0.000233698
Year	Carbon	Discounted Carbon Value		Carbon	Discounted Carbon Value
0	1	1		0	0			-1
1	0.934525	0.888948		1	0.951229			0.0654749
2	0.881134	0.797283		0.934525	0.845593			0.0533912
3	0.837359	0.720721		0.881134	0.758399			0.0437754
4	0.801242	0.656001		0.837359	0.685571			0.0361168
5	0.771231	0.600635		0.801242	0.624008			0.0300106
6	0.746095	0.552721		0.771231	0.571342			0.0251359
7	0.724857	0.510798		0.746095	0.525764			0.0212382
8	0.706741	0.473743		0.724857	0.485886			0.018116
9	0.691132	0.440685		0.706741	0.450638			0.0156093
10	0.67754	0.410949		0.691132	0.419193			0.0135914
11	0.665578	0.384005		0.67754	0.390907			0.0119618
12	0.654938	0.359437		0.665578	0.365277			0.0106407
13	0.645373	0.336914		0.654938	0.341908			0.00956497
14	0.636688	0.31617		0.645373	0.320483			0.00868453
15	0.628729	0.29699		0.636688	0.30075			0.00795962
16	0.62137	0.2792		0.628729	0.282506			0.00735871
17	0.614513	0.262652		0.62137	0.265583			0.0068568
18	0.608079	0.247227		0.614513	0.249842			0.00643405
19	0.602004	0.23282		0.608079	0.235169			0.00607471
20	0.596238	0.219344		0.602004	0.221465			0.00576628
21	0.590739	0.206722		0.596238	0.208646			0.00549884
22	0.585475	0.194888		0.590739	0.19664			0.0052645
23	0.580418	0.183782		0.585475	0.185383			0.00505699
24	0.575546	0.173351		0.580418	0.174818			0.00487134
25	0.570843	0.163549		0.575546	0.164897			0.00470357
26	0.566292	0.154333		0.570843	0.155573			0.00455054
27	0.561883	0.145663		0.566292	0.146806			0.0044097
28	0.557604	0.137503		0.561883	0.138559			0.00427907
29	0.553447	0.129822		0.557604	0.130797			0.00415703
30	0.549404	0.122589		0.553447	0.123491			0.00404229
31	0.54547	0.115775		0.549404	0.11661			0.00393381
32	0.54164	0.109355		0.54547	0.110129			0.00383077
33	0.537907	0.103305		0.54164	0.104022			0.00373249
34	0.534269	0.0976021		0.537907	0.0982668			0.00363842
35	0.530721	0.0922254		0.534269	0.092842			0.00354813
36	0.527259	0.0871554		0.530721	0.0877275			0.00346124
37	0.523882	0.0823737		0.527259	0.0829048			0.00337746
38	0.520585	0.0778632		0.523882	0.0783563			0.00329654
39	0.517367	0.0736079		0.520585	0.0740658			0.00321828
40	0.514225	0.0695927		0.517367	0.070018			0.00314248
41	0.511156	0.0658036		0.514225	0.0661987			0.00306902
42	0.508158	0.0622272		0.511156	0.0625943			0.00299776
43	0.505229	0.0588512		0.508158	0.0591923			0.00292858
44	0.502368	0.0556639		0.505229	0.055981			0.0028614
45	0.499572	0.0526545		0.502368	0.0529492			0.00279612
46	0.496839	0.0498125		0.499572	0.0500865			0.00273267
47	0.494168	0.0471284		0.496839	0.0473831			0.00267099
48	0.491557	0.0445931		0.494168	0.0448299			0.00261099
49	0.489004	0.0421979		0.491557	0.0424182			0.00255264
50	0.486509	0.0399351		0.489004	0.0401399			0.00249586
51	0.484068	0.0377968		0.486509	0.0379874			0.00244062
52	0.481681	0.0357762		0.484068	0.0359535			0.00238687
53	0.479347	0.0338664		0.481681	0.0340314			0.00233455
54	0.477063	0.0320613		0.479347	0.0322147			0.00228363
55	0.474829	0.0303548		0.477063	0.0304976			0.00223407
56	0.472643	0.0287415		0.474829	0.0288744			0.00218582
57	0.470504	0.027216		0.472643	0.0273397			0.00213885
58	0.468411	0.0257735		0.470504	0.0258887			0.00209313
59	0.466362	0.0244093		0.468411	0.0245165			0.00204861
60	0.464357	0.023119		0.466362	0.0232188			0.00200527
61	0.462394	0.0218985		0.464357	0.0219915			0.00196307
62	0.460472	0.0207439		0.462394	0.0208305			0.00192199
63	0.45859	0.0196516		0.460472	0.0197322			0.00188198
64	0.456747	0.018618		0.45859	0.0186931			0.00184303
65	0.454942	0.01764		0.456747	0.01771			0.0018051
66	0.453174	0.0167145		0.454942	0.0167797			0.00176816
67	0.451442	0.0158385		0.453174	0.0158993			0.00173219
68	0.449744	0.0150094		0.451442	0.0150661			0.00169717
69	0.448081	0.0142246		0.449744	0.0142774			0.00166306
70	0.446452	0.0134817		0.448081	0.0135309			0.00162984
71	0.444854	0.0127783		0.446452	0.0128242			0.00159749
72	0.443288	0.0121123		0.444854	0.0121551			0.00156598
73	0.441753	0.0114817		0.443288	0.0115216			0.00153529
74	0.440247	0.0108845		0.441753	0.0109217			0.00150541
75	0.438771	0.0103189		0.440247	0.0103536			0.0014763
76	0.437323	0.00978326		0.438771	0.00981565			0.00144795
77	0.435903	0.0092759		0.437323	0.00930612			0.00142033
78	0.434509	0.0087953		0.435903	0.00882351			0.00139343
79	0.433142	0.00834002		0.434509	0.00836635			0.00136723
80	0.4318	0.0079087		0.433142	0.00793328			0.00134171
81	0.430484	0.00750005		0.4318	0.00752299			0.00131684
82	0.429191	0.00711284		0.430484	0.00713427			0.00129262
83	0.427922	0.00674594		0.429191	0.00676595			0.00126903
84	0.426676	0.00639825		0.427922	0.00641694			0.00124604
85	0.425452	0.00606875		0.426676	0.00608621			0.00122364
86	0.42425	0.00575647		0.425452	0.00577277			0.00120183
87	0.42307	0.00546048		0.42425	0.00547572			0.00118057
88	0.42191	0.00517993		0.42307	0.00519417			0.00115985
89	0.42077	0.00491399		0.42191	0.0049273			0.00113967
90	0.41965	0.00466189		0.42077	0.00467434			0.00112001
91	0.41855	0.0044229		0.41965	0.00443453			0.00110085
92	0.417467	0.00419631		0.41855	0.00420719			0.00108217
93	0.416403	0.00398148		0.417467	0.00399166			0.00106397
94	0.415357	0.00377779		0.416403	0.0037873			0.00104624
95	0.414328	0.00358464		0.415357	0.00359354			0.00102896
96	0.413316	0.00340149		0.414328	0.00340982			0.00101211
97	0.41232	0.0032278		0.413316	0.00323559			0.000995697
98	0.411341	0.00306308		0.41232	0.00307038			0.000979696
99	0.410377	0.00290687		0.411341	0.00291369			0.000964099
100	0.409428	0.0027587		0.410377	0.0027651			0.000948896
101	0.408494	0.00261817		0.409428	0.00262416			0.000934075
102	0.407574	0.00248488		0.408494	0.00249048			0.000919628
103	0.406668	0.00235843		0.407574	0.00236369			0.000905543
104	0.405777	0.00223849		0.406668	0.00224341			0.000891811
105	0.404898	0.00212471		0.405777	0.00212932			0.000878423
106	0.404033	0.00201677		0.404898	0.00202109			0.000865369
107	0.40318	0.00191436		0.404033	0.00191841			0.000852641
108	0.40234	0.0018172		0.40318	0.001821			0.000840229
109	0.401512	0.00172502		0.40234	0.00172858			0.000828126
110	0.400696	0.00163755		0.401512	0.00164089			0.000816322
111	0.399891	0.00155456		0.400696	0.00155769			0.00080481
112	0.399097	0.00147581		0.399891	0.00147874			0.000793583
113	0.398314	0.00140108		0.399097	0.00140383			0.000782632
114	0.397543	0.00133016		0.398314	0.00133275			0.00077195
115	0.396781	0.00126287		0.397543	0.00126529			0.00076153
116	0.39603	0.001199		0.396781	0.00120128			0.000751365
117	0.395288	0.00113839		0.39603	0.00114053			0.000741448
118	0.394556	0.00108087		0.395288	0.00108287			0.000731772
119	0.393834	0.00102627		0.394556	0.00102815			0.000722332
120	0.393121	0.000974449		0.393834	0.000976217			0.00071312
121	0.392417	0.000925265		0.393121	0.000926925			0.000704131
122	0.391721	0.000878579		0.392417	0.000880139			0.000695359
123	0.391035	0.000834265		0.391721	0.000835731			0.000686797
124	0.390356	0.000792201		0.391035	0.000793578			0.000678441
125	0.389686	0.000752271		0.390356	0.000753565			0.000670284
126	0.389024	0.000714366		0.389686	0.000715582			0.000662322
127	0.388369	0.000678383		0.389024	0.000679526			0.00065455
128	0.387722	0.000644223		0.388369	0.000645297			0.000646961
129	0.387083	0.000611793		0.387722	0.000612803			0.000639552
130	0.38645	0.000581004		0.387083	0.000581955			0.000632317
131	0.385825	0.000551774		0.38645	0.000552669			0.000625253
132	0.385207	0.000524023		0.385825	0.000524864			0.000618353
133	0.384595	0.000497674		0.385207	0.000498466			0.000611615
134	0.38399	0.000472658		0.384595	0.000473403			0.000605034
135	0.383391	0.000448905		0.38399	0.000449606			0.000598604
136	0.382799	0.000426352		0.383391	0.000427012			0.000592324
137	0.382213	0.000404938		0.382799	0.000405559			0.000586188
138	0.381633	0.000384604		0.382213	0.000385189			0.000580192
139	0.381058	0.000365296		0.381633	0.000365847			0.000574334
140	0.38049	0.000346962		0.381058	0.00034748			0.000568609
141	0.379927	0.000329552		0.38049	0.00033004			0.000563014
142	0.379369	0.000313019		0.379927	0.000313479			0.000557545
143	0.378817	0.00029732		0.379369	0.000297753			0.000552199
144	0.37827	0.000282411		0.378817	0.000282819			0.000546973
145	0.377728	0.000268253		0.37827	0.000268638			0.000541863
146	0.377191	0.000254807		0.377728	0.00025517			0.000536867
147	0.376659	0.000242038		0.377191	0.00024238			0.000531981
148	0.376132	0.000229912		0.376659	0.000230234			0.000527203
149	0.37561	0.000218395		0.376132	0.000218699			0.00052253
150	0.375092	0.000207457		0.37561	0.000207744			0.000517958
151	0.374578	0.000197069		0.375092	0.000197339			0.000513486
152	0.374069	0.000187203		0.374578	0.000187458			0.000509111
153	0.373564	0.000177833		0.374069	0.000178073			0.000504829
154	0.373064	0.000168933		0.373564	0.00016916			0.000500639
155	0.372567	0.00016048		0.373064	0.000160694			0.000496539
156	0.372074	0.000152452		0.372567	0.000152654			0.000492525
157	0.371586	0.000144826		0.372074	0.000145017			0.000488596
158	0.371101	0.000137583		0.371586	0.000137763			0.000484749
159	0.37062	0.000130704		0.371101	0.000130873			0.000480983
160	0.370143	0.000124169		0.37062	0.000124329			0.000477294
161	0.369669	0.000117962		0.370143	0.000118113			0.000473682
162	0.369199	0.000112066		0.369669	0.000112209			0.000470143
163	0.368732	0.000106466		0.369199	0.000106601			0.000466677
164	0.368269	0.000101146		0.368732	0.000101274			0.000463281
165	0.367809	9.60933e-05		0.368269	9.62134e-05			0.000459953
166	0.367352	9.12933e-05		0.367809	9.14068e-05			0.000456692
167	0.366899	8.67336e-05		0.367352	8.68408e-05			0.000453495
168	0.366449	8.24023e-05		0.366899	8.25036e-05			0.000450362
169	0.366001	7.82878e-05		0.366449	7.83835e-05			0.000447291
170	0.365557	7.43793e-05		0.366001	7.44697e-05			0.000444279
171	0.365116	7.06664e-05		0.365557	7.07518e-05			0.000441326
172	0.364677	6.71392e-05		0.365116	6.72199e-05			0.000438429
173	0.364242	6.37885e-05		0.364677	6.38648e-05			0.000435588
174	0.363809	6.06054e-05		0.364242	6.06775e-05			0.000432801
175	0.363379	5.75815e-05		0.363809	5.76496e-05			0.000430066
176	0.362951	5.47088e-05		0.363379	5.47732e-05			0.000427382
177	0.362527	5.19797e-05		0.362951	5.20406e-05			0.000424749
178	0.362104	4.9387e-05		0.362527	4.94446e-05			0.000422164
179	0.361685	4.6924e-05		0.362104	4.69784e-05			0.000419626
180	0.361268	4.4584e-05		0.361685	4.46355e-05			0.000417134
181	0.360853	4.23609e-05		0.361268	4.24096e-05			0.000414687
182	0.360441	4.02489e-05		0.360853	4.02949e-05			0.000412284
183	0.360031	3.82424e-05		0.360441	3.82859e-05			0.000409923
184	0.359623	3.63361e-05		0.360031	3.63773e-05			0.000407604
185	0.359218	3.4525e-05		0.359623	3.4564e-05			0.000405326
186	0.358815	3.28044e-05		0.359218	3.28412e-05			0.000403087
187	0.358414	3.11696e-05		0.358815	3.12045e-05			0.000400886
188	0.358015	2.96165e-05		0.358414	2.96495e-05			0.000398723
189	0.357619	2.81409e-05		0.358015	2.81721e-05			0.000396596
190	0.357224	2.67389e-05		0.357619	2.67684e-05			0.000394505
191	0.356832	2.54069e-05		0.357224	2.54348e-05			0.000392448
192	0.356441	2.41413e-05		0.356832	2.41678e-05			0.000390425
193	0.356053	2.29389e-05		0.356441	2.29639e-05			0.000388435
194	0.355666	2.17965e-05		0.356053	2.18202e-05			0.000386477
195	0.355282	2.0711e-05		0.355666	2.07334e-05			0.00038455
196	0.354899	1.96797e-05		0.355282	1.97009e-05			0.000382654
197	0.354518	1.86998e-05		0.354899	1.87199e-05			0.000380788
198	0.354139	1.77688e-05		0.354518	1.77878e-05			0.00037895
199	0.353762	1.68842e-05		0.354139	1.69022e-05			0.000377141
200	0.353387	1.60437e-05		0.353762	1.60608e-05			0.000375359
201	0.353013	1.52451e-05		0.353387	1.52613e-05			0.000373604
202	0.352641	1.44864e-05		0.353013	1.45016e-05			0.000371875
203	0.352271	1.37654e-05		0.352641	1.37798e-05			0.000370172
204	0.351903	1.30803e-05		0.352271	1.3094e-05			0.000368494
205	0.351536	1.24294e-05		0.351903	1.24424e-05			0.00036684
206	0.351171	1.1811e-05		0.351536	1.18232e-05			0.000365209
207	0.350807	1.12233e-05		0.351171	1.12349e-05			0.000363602
208	0.350445	1.06649e-05		0.350807	1.06759e-05			0.000362017
209	0.350085	1.01343e-05		0.350445	1.01448e-05			0.000360454
210	0.349726	9.6302e-06		0.350085	9.64009e-06			0.000358912
211	0.349368	9.15117e-06		0.349726	9.16053e-06			0.000357392
212	0.349012	8.696e-06		0.349368	8.70486e-06			0.000355891
213	0.348658	8.26349e-06		0.349012	8.27189e-06			0.000354411
214	0.348305	7.85252e-06		0.348658	7.86047e-06			0.00035295
215	0.347954	7.46201e-06		0.348305	7.46954e-06			0.000351507
216	0.347603	7.09094e-06		0.347954	7.09808e-06			0.000350084
217	0.347255	6.73834e-06		0.347603	6.74511e-06			0.000348678
218	0.346908	6.4033e-06		0.347255	6.40971e-06			0.00034729
219	0.346562	6.08493e-06		0.346908	6.09101e-06			0.000345919
220	0.346217	5.78241e-06		0.346562	5.78817e-06			0.000344565
221	0.345874	5.49495e-06		0.346217	5.5004e-06			0.000343227
222	0.345532	5.22179e-06		0.345874	5.22696e-06			0.000341905
223	0.345191	4.96222e-06		0.345532	4.96712e-06			0.000340599
224	0.344852	4.71557e-06		0.345191	4.72021e-06			0.000339307
225	0.344514	4.4812e-06		0.344852	4.48559e-06			0.000338031
226	0.344177	4.25848e-06		0.344514	4.26265e-06			0.000336769
227	0.343842	4.04684e-06		0.344177	4.05079e-06			0.000335522
228	0.343507	3.84573e-06		0.343842	3.84947e-06			0.000334288
229	0.343174	3.65463e-06		0.343507	3.65817e-06			0.000333067
230	0.342842	3.47303e-06		0.343174	3.47639e-06			0.00033186
231	0.342512	3.30046e-06		0.342842	3.30364e-06			0.000330666
232	0.342182	3.13647e-06		0.342512	3.13949e-06			0.000329484
233	0.341854	2.98064e-06		0.342182	2.98351e-06			0.000328315
234	0.341527	2.83256e-06		0.341854	2.83528e-06			0.000327157
235	0.341201	2.69184e-06		0.341527	2.69442e-06			0.000326012
236	0.340876	2.55812e-06		0.341201	2.56056e-06			0.000324877
237	0.340552	2.43105e-06		0.340876	2.43336e-06			0.000323754
238	0.34023	2.3103e-06		0.340552	2.31249e-06			0.000322642
239	0.339908	2.19554e-06		0.34023	2.19762e-06			0.000321541
240	0.339588	2.0865e-06		0.339908	2.08847e-06			0.00032045
241	0.339268	1.98287e-06		0.339588	1.98474e-06			0.000319369
242	0.33895	1.8844e-06		0.339268	1.88617e-06			0.000318299
243	0.338633	1.79082e-06		0.33895	1.79249e-06			0.000317238
244	0.338316	1.70189e-06		0.338633	1.70348e-06			0.000316187
245	0.338001	1.61738e-06		0.338316	1.61888e-06			0.000315145
246	0.337687	1.53707e-06		0.338001	1.5385e-06			0.000314112
247	0.337374	1.46075e-06		0.337687	1.4621e-06			0.000313088
248	0.337062	1.38822e-06		0.337374	1.38951e-06			0.000312073
249	0.336751	1.3193e-06		0.337062	1.32052e-06			0.000311066
250	0.336441	1.2538e-06		0.336751	1.25495e-06			0.000310068
251	0.336132	1.19155e-06		0.336441	1.19265e-06			0.000309078
252	0.335824	1.1324e-06		0.336132	1.13344e-06			0.000308096
253	0.335517	1.07619e-06		0.335824	1.07717e-06			0.000307122
254	0.33521	1.02277e-06		0.335517	1.0237e-06			0.000306156
255	0.334905	9.72002e-07		0.33521	9.72888e-07			0.000305197
256	0.334601	9.23757e-07		0.334905	9.24597e-07			0.000304246
257	0.334298	8.77909e-07		0.334601	8.78705e-07			0.000303302
258	0.333995	8.34337e-07		0.334298	8.35093e-07			0.000302365
259	0.333694	7.9293e-07		0.333995	7.93646e-07			0.000301434
260	0.333393	7.53579e-07		0.333694	7.54258e-07			0.000300511
261	0.333094	7.16182e-07		0.333393	7.16826e-07			0.000299594
262	0.332795	6.80643e-07		0.333094	6.81254e-07			0.000298684
263	0.332497	6.46868e-07		0.332795	6.47447e-07			0.00029778
264	0.3322	6.14771e-07		0.332497	6.1532e-07			0.000296883
265	0.331904	5.84267e-07		0.3322	5.84788e-07			0.000295991
266	0.331609	5.55278e-07		0.331904	5.55772e-07			0.000295106
267	0.331315	5.27728e-07		0.331609	5.28196e-07			0.000294227
268	0.331022	5.01546e-07		0.331315	5.0199e-07			0.000293353
269	0.330729	4.76663e-07		0.331022	4.77085e-07			0.000292485
270	0.330438	4.53017e-07		0.330729	4.53416e-07			0.000291623
271	0.330147	4.30543e-07		0.330438	4.30923e-07			0.000290766
272	0.329857	4.09186e-07		0.330147	4.09546e-07			0.000289914
273	0.329568	3.88889e-07		0.329857	3.8923e-07			0.000289068
274	0.32928	3.69599e-07		0.329568	3.69922e-07			0.000288227
275	0.328992	3.51266e-07		0.32928	3.51573e-07			0.000287391
276	0.328706	3.33844e-07		0.328992	3.34135e-07			0.00028656
277	0.32842	3.17286e-07		0.328706	3.17562e-07			0.000285734
278	0.328135	3.0155e-07		0.32842	3.01812e-07			0.000284912
279	0.327851	2.86595e-07		0.328135	2.86843e-07			0.000284096
280	0.327568	2.72382e-07		0.327851	2.72618e-07			0.000283284
281	0.327285	2.58874e-07		0.327568	2.59098e-07			0.000282476
282	0.327004	2.46037e-07		0.327285	2.46249e-07			0.000281673
283	0.326723	2.33837e-07		0.327004	2.34038e-07			0.000280875
284	0.326443	2.22242e-07		0.326723	2.22432e-07			0.00028008
285	0.326163	2.11222e-07		0.326443	2.11403e-07			0.00027929
286	0.325885	2.00749e-07		0.326163	2.0092e-07			0.000278505
287	0.325607	1.90795e-07		0.325885	1.90958e-07			0.000277723
288	0.32533	1.81336e-07		0.325607	1.8149e-07			0.000276945
289	0.325054	1.72346e-07		0.32533	1.72492e-07			0.000276172
290	0.324779	1.63801e-07		0.325054	1.6394e-07			0.000275402
291	0.324504	1.55681e-07		0.324779	1.55813e-07			0.000274636
292	0.32423	1.47963e-07		0.324504	1.48088e-07			0.000273874
293	0.323957	1.40628e-07		0.32423	1.40747e-07			0.000273115
294	0.323685	1.33657e-07		0.323957	1.3377e-07			0.000272361
295	0.323413	1.27032e-07		0.323685	1.27139e-07			0.00027161
296	0.323142	1.20736e-07		0.323413	1.20837e-07			0.000270862
297	0.322872	1.14751e-07		0.323142	1.14847e-07			0.000270118
298	0.322603	1.09064e-07		0.322872	1.09155e-07			0.000269377
299	0.322334	1.03658e-07		0.322603	1.03745e-07			0.00026864
300	0.322066	9.85208e-08		0.322334	9.86027e-08			0.000267906
301	0.321799	9.36381e-08		0.322066	9.37158e-08			0.000267176
302	0.321532	8.89976e-08		0.321799	8.90713e-08			0.000266449
303	0.321267	8.45871e-08		0.321532	8.46571e-08			0.000265725
304	0.321002	8.03954e-08		0.321267	8.04618e-08			0.000265004
305	0.320737	7.64115e-08		0.321002	7.64745e-08			0.000264286
306	0.320474	7.26252e-08		0.320737	7.26849e-08			0.000263571
307	0.320211	6.90265e-08		0.320474	6.90832e-08			0.00026286
308	0.319949	6.56063e-08		0.320211	6.56601e-08			0.000262151
309	0.319687	6.23556e-08		0.319949	6.24066e-08			0.000261445
310	0.319427	5.92661e-08		0.319687	5.93145e-08			0.000260742
311	0.319167	5.63298e-08		0.319427	5.63757e-08			0.000260042
312	0.318907	5.3539e-08		0.319167	5.35826e-08			0.000259345
313	0.318649	5.08866e-08		0.318907	5.09279e-08			0.000258651
314	0.318391	4.83656e-08		0.318649	4.84048e-08			0.00025796
315	0.318133	4.59696e-08		0.318391	4.60068e-08			0.000257271
316	0.317877	4.36924e-08		0.318133	4.37277e-08			0.000256585
317	0.317621	4.15281e-08		0.317877	4.15615e-08			0.000255901
318	0.317366	3.9471e-08		0.317621	3.95027e-08			0.000255221
319	0.317111	3.75158e-08		0.317366	3.75459e-08			0.000254543
320	0.316857	3.56576e-08		0.317111	3.56862e-08			0.000253867
321	0.316604	3.38914e-08		0.316857	3.39185e-08			0.000253194
322	0.316352	3.22128e-08		0.316604	3.22385e-08			0.000252524
323	0.3161	3.06174e-08		0.316352	3.06418e-08			0.000251856
324	0.315849	2.9101e-08		0.3161	2.91242e-08			0.00025119
325	0.315598	2.76598e-08		0.315849	2.76817e-08			0.000250527
326	0.315348	2.629e-08		0.315598	2.63108e-08			0.000249866
327	0.315099	2.4988e-08		0.315348	2.50078e-08			0.000249208
328	0.31485	2.37506e-08		0.315099	2.37694e-08			0.000248552
329	0.314602	2.25745e-08		0.31485	2.25923e-08			0.000247898
330	0.314355	2.14566e-08		0.314602	2.14735e-08			0.000247247
331	0.314109	2.03942e-08		0.314355	2.04102e-08			0.000246598
332	0.313863	1.93844e-08		0.314109	1.93995e-08			0.000245951
333	0.313617	1.84246e-08		0.313863	1.8439e-08			0.000245307
334	0.313373	1.75123e-08		0.313617	1.7526e-08			0.000244664
335	0.313129	1.66452e-08		0.313373	1.66582e-08			0.000244024
336	0.312885	1.58211e-08		0.313129	1.58335e-08			0.000243386
337	0.312643	1.50379e-08		0.312885	1.50495e-08			0.00024275
338	0.3124	1.42934e-08		0.312643	1.43045e-08			0.000242117
339	0.312159	1.35858e-08		0.3124	1.35963e-08			0.000241485
340	0.311918	1.29132e-08		0.312159	1.29232e-08			0.000240856
341	0.311678	1.2274e-08		0.311918	1.22834e-08			0.000240229
342	0.311438	1.16664e-08		0.311678	1.16754e-08			0.000239603
343	0.311199	1.10889e-08		0.311438	1.10974e-08			0.00023898
344	0.310961	1.054e-08		0.311199	1.05481e-08			0.000238359
345	0.310723	1.00183e-08		0.310961	1.0026e-08			0.00023774
346	0.310486	9.52243e-09		0.310723	9.5297e-09			0.000237122
347	0.31025	9.05111e-09		0.310486	9.05801e-09			0.000236507
348	0.310014	8.60314e-09		0.31025	8.60968e-09			0.000235894
349	0.309778	8.17735e-09		0.310014	8.18356e-09			0.000235282
350	0.309544	7.77264e-09		0.309778	7.77853e-09			0.000234673
351	0.30931	7.38797e-09		0.309544	7.39356e-09			0.000234065
352	0.309076	7.02235e-09		0.30931	7.02766e-09			0.00023346
353	0.308843	6.67484e-09		0.309076	6.67987e-09			0.000232856
354	0.308611	6.34453e-09		0.308843	6.3493e-09			0.000232254
355	0.308379	6.03057e-09		0.308611	6.0351e-09			0.000231654
356	0.308148	5.73216e-09		0.308379	5.73646e-09			0.000231056
357	0.307918	5.44852e-09		0.308148	5.4526e-09			0.00023046
358	0.307688	5.17892e-09		0.307918	5.18279e-09			0.000229865
359	0.307459	4.92267e-09		0.307688	4.92634e-09			0.000229272
360	0.30723	4.67911e-09		0.307459	4.68259e-09			0.000228681
361	0.307002	4.4476e-09		0.30723	4.45091e-09			0.000228092
362	0.306774	4.22755e-09		0.307002	4.23069e-09			0.000227505
363	0.306548	4.0184e-09		0.306774	4.02137e-09			0.000226919
364	0.306321	3.8196e-09		0.306548	3.82242e-09			0.000226335
365	0.306095	3.63064e-09		0.306321	3.63331e-09			0.000225753
366	0.30587	3.45103e-09		0.306095	3.45357e-09			0.000225173
367	0.305646	3.28031e-09		0.30587	3.28272e-09			0.000224594
368	0.305422	3.11804e-09		0.305646	3.12032e-09			0.000224017
369	0.305198	2.9638e-09		0.305422	2.96597e-09			0.000223441
370	0.304975	2.81719e-09		0.305198	2.81925e-09			0.000222868
371	0.304753	2.67785e-09		0.304975	2.6798e-09			0.000222296
372	0.304531	2.54539e-09		0.304753	2.54725e-09			0.000221725
373	0.30431	2.41949e-09		0.304531	2.42125e-09			0.000221157
374	0.30409	2.29982e-09		0.30431	2.30149e-09			0.000220589
375	0.30387	2.18608e-09		0.30409	2.18766e-09			0.000220024
376	0.30365	2.07796e-09		0.30387	2.07946e-09			0.00021946
377	0.303431	1.97519e-09		0.30365	1.97662e-09			0.000218898
378	0.303213	1.87751e-09		0.303431	1.87886e-09			0.000218337
379	0.302995	1.78466e-09		0.303213	1.78594e-09			0.000217778
380	0.302778	1.6964e-09		0.302995	1.69762e-09			0.000217221
381	0.302561	1.61251e-09		0.302778	1.61367e-09			0.000216665
382	0.302345	1.53277e-09		0.302561	1.53387e-09			0.00021611
383	0.30213	1.45698e-09		0.302345	1.45802e-09			0.000215558
384	0.301915	1.38494e-09		0.30213	1.38592e-09			0.000215006
385	0.3017	1.31646e-09		0.301915	1.31739e-09			0.000214457
386	0.301486	1.25136e-09		0.3017	1.25225e-09			0.000213909
387	0.301273	1.18949e-09		0.301486	1.19033e-09			0.000213362
388	0.30106	1.13068e-09		0.301273	1.13148e-09			0.000212817
389	0.300848	1.07478e-09		0.30106	1.07554e-09			0.000212273
390	0.300636	1.02164e-09		0.300848	1.02236e-09			0.000211731
391	0.300425	9.71133e-10		0.300636	9.71816e-10			0.000211191
392	0.300214	9.23122e-10		0.300425	9.2377e-10			0.000210651
393	0.300004	8.77487e-10		0.300214	8.78101e-10			0.000210114
394	0.299794	8.34108e-10		0.300004	8.34691e-10			0.000209578
395	0.299585	7.92875e-10		0.299794	7.93428e-10			0.000209043
396	0.299377	7.53681e-10		0.299585	7.54206e-10			0.00020851
397	0.299169	7.16426e-10		0.299377	7.16924e-10			0.000207978
398	0.298961	6.81012e-10		0.299169	6.81485e-10			0.000207448
399	0.298755	6.47351e-10		0.298961	6.47799e-10			0.000206919
400	0.298548	6.15354e-10		0.298755	6.15779e-10			0.000206391
401	0.298342	5.84939e-10		0.298548	5.85343e-10			0.000205865
402	0.298137	5.56028e-10		0.298342	5.56411e-10			0.000205341
403	0.297932	5.28547e-10		0.298137	5.2891e-10			0.000204817
404	0.297728	5.02425e-10		0.297932	5.02769e-10			0.000204296
405	0.297524	4.77594e-10		0.297728	4.77921e-10			0.000203775
406	0.297321	4.53991e-10		0.297524	4.54301e-10			0.000203256
407	0.297118	4.31555e-10		0.297321	4.3185e-10			0.000202739
408	0.296916	4.10229e-10		0.297118	4.10508e-10			0.000202223
409	0.296714	3.89956e-10		0.296916	3.90222e-10			0.000201708
410	0.296513	3.70687e-10		0.296714	3.70938e-10			0.000201194
411	0.296312	3.52369e-10		0.296513	3.52608e-10			0.000200682
412	0.296112	3.34958e-10		0.296312	3.35184e-10			0.000200172
413	0.295912	3.18407e-10		0.296112	3.18622e-10			0.000199662
414	0.295713	3.02674e-10		0.295912	3.02878e-10			0.000199154
415	0.295515	2.87719e-10		0.295713	2.87912e-10			0.000198648
416	0.295317	2.73503e-10		0.295515	2.73687e-10			0.000198143
417	0.295119	2.5999e-10		0.295317	2.60164e-10			0.000197639
418	0.294922	2.47145e-10		0.295119	2.4731e-10			0.000197136
419	0.294725	2.34935e-10		0.294922	2.35092e-10			0.000196635
420	0.294529	2.23328e-10		0.294725	2.23477e-10			0.000196135
421	0.294333	2.12295e-10		0.294529	2.12437e-10			0.000195636
422	0.294138	2.01808e-10		0.294333	2.01942e-10			0.000195139
423	0.293944	1.91838e-10		0.294138	1.91965e-10			0.000194643
424	0.293749	1.82362e-10		0.293944	1.82482e-10			0.000194148
425	0.293556	1.73354e-10		0.293749	1.73468e-10			0.000193655
426	0.293363	1.64791e-10		0.293556	1.64899e-10			0.000193163
427	0.29317	1.56651e-10		0.293363	1.56754e-10			0.000192672
428	0.292978	1.48913e-10		0.29317	1.49011e-10			0.000192182
429	0.292786	1.41558e-10		0.292978	1.4165e-10			0.000191694
430	0.292595	1.34566e-10		0.292786	1.34654e-10			0.000191207
431	0.292404	1.2792e-10		0.292595	1.28003e-10			0.000190722
432	0.292214	1.21602e-10		0.292404	1.21681e-10			0.000190237
433	0.292024	1.15596e-10		0.292214	1.15671e-10			0.000189754
434	0.291835	1.09887e-10		0.292024	1.09958e-10			0.000189272
435	0.291646	1.0446e-10		0.291835	1.04528e-10			0.000188791
436	0.291458	9.93015e-11		0.291646	9.93657e-11			0.000188312
437	0.29127	9.43977e-11		0.291458	9.44585e-11			0.000187834
438	0.291083	8.97361e-11		0.29127	8.97938e-11			0.000187357
439	0.290896	8.53048e-11		0.291083	8.53596e-11			0.000186881
440	0.290709	8.10924e-11		0.290896	8.11444e-11			0.000186407
441	0.290523	7.70882e-11		0.290709	7.71375e-11			0.000185934
442	0.290338	7.32817e-11		0.290523	7.33285e-11			0.000185462
443	0.290153	6.96633e-11		0.290338	6.97077e-11			0.000184991
444	0.289968	6.62236e-11		0.290153	6.62658e-11			0.000184522
445	0.289784	6.29539e-11		0.289968	6.29939e-11			0.000184053
446	0.289601	5.98457e-11		0.289784	5.98836e-11			0.000183586
447	0.289418	5.6891e-11		0.289601	5.6927e-11			0.000183121
448	0.289235	5.40822e-11		0.289418	5.41164e-11			0.000182656
449	0.289053	5.14122e-11		0.289235	5.14446e-11			0.000182192
450	0.288871	4.8874e-11		0.289053	4.89048e-11			0.00018173
451	0.28869	4.64612e-11		0.288871	4.64904e-11			0.000181269
452	0.288509	4.41676e-11		0.28869	4.41953e-11			0.000180809
453	0.288329	4.19873e-11		0.288509	4.20135e-11			0.000180351
454	0.288149	3.99146e-11		0.288329	3.99395e-11			0.000179893
455	0.287969	3.79443e-11		0.288149	3.7968e-11			0.000179437
456	0.28779	3.60713e-11		0.287969	3.60937e-11			0.000178982
457	0.287612	3.42908e-11		0.28779	3.43121e-11			0.000178528
458	0.287434	3.25982e-11		0.287612	3.26184e-11			0.000178075
459	0.287256	3.09892e-11		0.287434	3.10084e-11			0.000177623
460	0.287079	2.94597e-11		0.287256	2.94779e-11			0.000177173
461	0.286902	2.80057e-11		0.287079	2.80229e-11			0.000176724
462	0.286726	2.66235e-11		0.286902	2.66398e-11			0.000176275
463	0.28655	2.53095e-11		0.286726	2.5325e-11			0.000175828
464	0.286375	2.40604e-11		0.28655	2.40751e-11			0.000175383
465	0.2862	2.2873e-11		0.286375	2.28869e-11			0.000174938
466	0.286025	2.17442e-11		0.2862	2.17574e-11			0.000174494
467	0.285851	2.06711e-11		0.286025	2.06837e-11			0.000174052
468	0.285678	1.9651e-11		0.285851	1.9663e-11			0.000173611
469	0.285504	1.86813e-11		0.285678	1.86926e-11			0.00017317
470	0.285332	1.77595e-11		0.285504	1.77702e-11			0.000172731
471	0.285159	1.68831e-11		0.285332	1.68933e-11			0.000172293
472	0.284988	1.605e-11		0.285159	1.60597e-11			0.000171857
473	0.284816	1.52581e-11		0.284988	1.52673e-11			0.000171421
474	0.284645	1.45052e-11		0.284816	1.45139e-11			0.000170987
475	0.284475	1.37895e-11		0.284645	1.37978e-11			0.000170553
476	0.284304	1.31092e-11		0.284475	1.3117e-11			0.000170121
477	0.284135	1.24624e-11		0.284304	1.24698e-11			0.00016969
478	0.283965	1.18475e-11		0.284135	1.18546e-11			0.000169259
479	0.283797	1.1263e-11		0.283965	1.12697e-11			0.00016883
480	0.283628	1.07073e-11		0.283797	1.07137e-11			0.000168403
481	0.28346	1.01791e-11		0.283628	1.01851e-11			0.000167976
482	0.283293	9.67695e-12		0.28346	9.68267e-12			0.00016755
483	0.283126	9.19957e-12		0.283293	9.205e-12			0.000167125
484	0.282959	8.74575e-12		0.283126	8.7509e-12			0.000166702
485	0.282793	8.31432e-12		0.282959	8.31921e-12			0.000166279
486	0.282627	7.90419e-12		0.282793	7.90883e-12			0.000165858
487	0.282461	7.5143e-12		0.282627	7.5187e-12			0.000165438
488	0.282296	7.14364e-12		0.282461	7.14782e-12			0.000165018
489	0.282132	6.79128e-12		0.282296	6.79524e-12			0.0001646
490	0.281968	6.45631e-12		0.282132	6.46007e-12			0.000164183
491	0.281804	6.13786e-12		0.281968	6.14143e-12			0.000163767
492	0.28164	5.83513e-12		0.281804	5.83852e-12			0.000163352
493	0.281477	5.54734e-12		0.28164	5.55055e-12			0.000162938
494	0.281315	5.27374e-12		0.281477	5.27679e-12			0.000162525
495	0.281153	5.01365e-12		0.281315	5.01654e-12			0.000162113
496	0.280991	4.76639e-12		0.281153	4.76913e-12			0.000161703
497	0.28083	4.53133e-12		0.280991	4.53393e-12			0.000161293
498	0.280669	4.30786e-12		0.28083	4.31033e-12			0.000160884
499	0.280508	4.09542e-12		0.280669	4.09776e-12			0.000160477
500	0.280348	3.89346e-12		0.280508	3.89569e-12			0.00016007
501	0.280189	3.70147e-12		0.280348	3.70358e-12			0.000159664
502	0.280029	3.51894e-12		0.280189	3.52094e-12			0.00015926
503	0.279871	3.34542e-12		0.280029	3.34732e-12			0.000158856
504	0.279712	3.18046e-12		0.279871	3.18227e-12			0.000158454
505	0.279554	3.02364e-12		0.279712	3.02535e-12			0.000158052
506	0.279396	2.87455e-12		0.279554	2.87618e-12			0.000157652
507	0.279239	2.73282e-12		0.279396	2.73436e-12			0.000157253
508	0.279082	2.59808e-12		0.279239	2.59954e-12			0.000156854
509	0.278926	2.46998e-12		0.279082	2.47137e-12			0.000156457
510	0.27877	2.34821e-12		0.278926	2.34952e-12			0.000156061
511	0.278614	2.23244e-12		0.27877	2.23368e-12			0.000155665
512	0.278459	2.12238e-12		0.278614	2.12356e-12			0.000155271
513	0.278304	2.01774e-12		0.278459	2.01887e-12			0.000154877
514	0.27815	1.91827e-12		0.278304	1.91934e-12			0.000154485
515	0.277995	1.82371e-12		0.27815	1.82472e-12			0.000154094
516	0.277842	1.7338e-12		0.277995	1.73476e-12			0.000153703
517	0.277688	1.64833e-12		0.277842	1.64924e-12			0.000153314
518	0.277536	1.56708e-12		0.277688	1.56794e-12			0.000152926
519	0.277383	1.48983e-12		0.277536	1.49065e-12			0.000152538
520	0.277231	1.4164e-12		0.277383	1.41717e-12			0.000152152
521	0.277079	1.34658e-12		0.277231	1.34732e-12			0.000151766
522	0.276928	1.28021e-12		0.277079	1.28091e-12			0.000151382
523	0.276777	1.21711e-12		0.276928	1.21777e-12			0.000150999
524	0.276626	1.15712e-12		0.276777	1.15775e-12			0.000150616
525	0.276476	1.10009e-12		0.276626	1.10068e-12			0.000150235
526	0.276326	1.04587e-12		0.276476	1.04644e-12			0.000149854
527	0.276176	9.94322e-13		0.276326	9.9486e-13			0.000149474
528	0.276027	9.45318e-13		0.276176	9.45828e-13			0.000149096
529	0.275879	8.9873e-13		0.276027	8.99214e-13			0.000148718
530	0.27573	8.54438e-13		0.275879	8.54898e-13			0.000148341
531	0.275582	8.12331e-13		0.27573	8.12767e-13			0.000147966
532	0.275435	7.72299e-13		0.275582	7.72713e-13			0.000147591
533	0.275288	7.34241e-13		0.275435	7.34634e-13			0.000147217
534	0.275141	6.98059e-13		0.275288	6.98432e-13			0.000146844
535	0.274994	6.63661e-13		0.275141	6.64014e-13			0.000146472
536	0.274848	6.30958e-13		0.274994	6.31294e-13			0.000146101
537	0.274702	5.99868e-13		0.274848	6.00186e-13			0.000145731
538	0.274557	5.7031e-13		0.274702	5.70612e-13			0.000145362
539	0.274412	5.42209e-13		0.274557	5.42496e-13			0.000144994
540	0.274267	5.15494e-13		0.274412	5.15765e-13			0.000144627
541	0.274123	4.90095e-13		0.274267	4.90353e-13			0.00014426
542	0.273979	4.65948e-13		0.274123	4.66192e-13			0.000143895
543	0.273836	4.42991e-13		0.273979	4.43223e-13			0.000143531
544	0.273693	4.21166e-13		0.273836	4.21386e-13			0.000143167
545	0.27355	4.00416e-13		0.273693	4.00625e-13			0.000142804
546	0.273407	3.80689e-13		0.27355	3.80888e-13			0.000142443
547	0.273265	3.61935e-13		0.273407	3.62123e-13			0.000142082
548	0.273124	3.44104e-13		0.273265	3.44283e-13			0.000141722
549	0.272982	3.27153e-13		0.273124	3.27322e-13			0.000141363
550	0.272841	3.11037e-13		0.272982	3.11197e-13			0.000141005
551	0.272701	2.95715e-13		0.272841	2.95867e-13			0.000140648
552	0.27256	2.81148e-13		0.272701	2.81293e-13			0.000140292
553	0.27242	2.67299e-13		0.27256	2.67436e-13			0.000139937
554	0.272281	2.54132e-13		0.27242	2.54262e-13			0.000139582
555	0.272141	2.41614e-13		0.272281	2.41738e-13			0.000139229
556	0.272003	2.29713e-13		0.272141	2.29831e-13			0.000138876
557	0.271864	2.18399e-13		0.272003	2.1851e-13			0.000138524
558	0.271726	2.07642e-13		0.271864	2.07747e-13			0.000138173
559	0.271588	1.97415e-13		0.271726	1.97515e-13			0.000137823
560	0.271451	1.87692e-13		0.271588	1.87787e-13			0.000137474
561	0.271313	1.78448e-13		0.271451	1.78538e-13			0.000137126
562	0.271177	1.69659e-13		0.271313	1.69745e-13			0.000136779
563	0.27104	1.61304e-13		0.271177	1.61385e-13			0.000136433
564	0.270904	1.5336e-13		0.27104	1.53437e-13			0.000136087
565	0.270768	1.45807e-13		0.270904	1.4588e-13			0.000135742
566	0.270633	1.38627e-13		0.270768	1.38696e-13			0.000135399
567	0.270498	1.318e-13		0.270633	1.31866e-13			0.000135056
568	0.270363	1.2531e-13		0.270498	1.25372e-13			0.000134714
569	0.270229	1.19139e-13		0.270363	1.19198e-13			0.000134373
570	0.270095	1.13272e-13		0.270229	1.13328e-13			0.000134032
571	0.269961	1.07695e-13		0.270095	1.07748e-13			0.000133693
572	0.269828	1.02392e-13		0.269961	1.02442e-13			0.000133354
573	0.269695	9.73499e-14		0.269828	9.73979e-14			0.000133016
574	0.269562	9.25566e-14		0.269695	9.26021e-14			0.00013268
575	0.26943	8.79993e-14		0.269562	8.80425e-14			0.000132344
576	0.269298	8.36665e-14		0.26943	8.37075e-14			0.000132008
577	0.269166	7.95471e-14		0.269298	7.9586e-14			0.000131674
578	0.269035	7.56307e-14		0.269166	7.56676e-14			0.000131341
579	0.268904	7.19071e-14		0.269035	7.19421e-14			0.000131008
580	0.268773	6.83669e-14		0.268904	6.84001e-14			0.000130676
581	0.268643	6.5001e-14		0.268773	6.50326e-14			0.000130345
582	0.268513	6.1801e-14		0.268643	6.18309e-14			0.000130015
583	0.268383	5.87585e-14		0.268513	5.87869e-14			0.000129686
584	0.268254	5.58659e-14		0.268383	5.58928e-14			0.000129358
585	0.268125	5.31157e-14		0.268254	5.31413e-14			0.00012903
586	0.267996	5.0501e-14		0.268125	5.05252e-14			0.000128703
587	0.267868	4.8015e-14		0.267996	4.8038e-14			0.000128377
588	0.267739	4.56515e-14		0.267868	4.56733e-14			0.000128052
589	0.267612	4.34043e-14		0.267739	4.3425e-14			0.000127728
590	0.267484	4.12678e-14		0.267612	4.12874e-14			0.000127404
591	0.267357	3.92365e-14		0.267484	3.92551e-14			0.000127082
592	0.267231	3.73052e-14		0.267357	3.73229e-14			0.00012676
593	0.267104	3.5469e-14		0.267231	3.54858e-14			0.000126439
594	0.266978	3.37232e-14		0.267104	3.37392e-14			0.000126119
595	0.266852	3.20634e-14		0.266978	3.20785e-14			0.000125799
596	0.266727	3.04853e-14		0.266852	3.04997e-14			0.000125481
597	0.266602	2.89849e-14		0.266727	2.89985e-14			0.000125163
598	0.266477	2.75584e-14		0.266602	2.75713e-14			0.000124846
599	0.266352	2.62021e-14		0.266477	2.62144e-14			0.00012453
600	0.266228	2.49126e-14		0.266352	2.49242e-14			0.000124215
601	0.266104	2.36866e-14		0.266228	2.36976e-14			0.0001239
602	0.26598	2.25209e-14		0.266104	2.25314e-14			0.000123586
603	0.265857	2.14126e-14		0.26598	2.14225e-14			0.000123273
604	0.265734	2.03589e-14		0.265857	2.03683e-14			0.000122961
605	0.265612	1.9357e-14		0.265734	1.9366e-14			0.00012265
606	0.265489	1.84045e-14		0.265612	1.8413e-14			0.000122339
607	0.265367	1.74989e-14		0.265489	1.75069e-14			0.000122029
608	0.265245	1.66378e-14		0.265367	1.66454e-14			0.00012172
609	0.265124	1.58191e-14		0.265245	1.58264e-14			0.000121412
610	0.265003	1.50407e-14		0.265124	1.50476e-14			0.000121105
611	0.264882	1.43007e-14		0.265003	1.43072e-14			0.000120798
612	0.264762	1.3597e-14		0.264882	1.36032e-14			0.000120492
613	0.264641	1.2928e-14		0.264762	1.29339e-14			0.000120187
614	0.264522	1.22919e-14		0.264641	1.22975e-14			0.000119882
615	0.264402	1.16872e-14		0.264522	1.16925e-14			0.000119579
616	0.264283	1.11122e-14		0.264402	1.11172e-14			0.000119276
617	0.264164	1.05655e-14		0.264283	1.05702e-14			0.000118974
618	0.264045	1.00457e-14		0.264164	1.00502e-14			0.000118673
619	0.263927	9.55145e-15		0.264045	9.55573e-15			0.000118372
620	0.263809	9.08155e-15		0.263927	9.08562e-15			0.000118072
621	0.263691	8.63478e-15		0.263809	8.63864e-15			0.000117773
622	0.263573	8.21e-15		0.263691	8.21366e-15			0.000117475
623	0.263456	7.80612e-15		0.263573	7.80959e-15			0.000117178
624	0.263339	7.42212e-15		0.263456	7.42541e-15			0.000116881
625	0.263223	7.05701e-15		0.263339	7.06014e-15			0.000116585
626	0.263106	6.70987e-15		0.263223	6.71284e-15			0.00011629
627	0.26299	6.37981e-15		0.263106	6.38263e-15			0.000115995
628	0.262875	6.066e-15		0.26299	6.06867e-15			0.000115702
629	0.262759	5.76762e-15		0.262875	5.77015e-15			0.000115409
630	0.262644	5.48393e-15		0.262759	5.48633e-15			0.000115116
631	0.262529	5.21419e-15		0.262644	5.21647e-15			0.000114825
632	0.262415	4.95773e-15		0.262529	4.95989e-15			0.000114534
633	0.262301	4.71389e-15		0.262415	4.71594e-15			0.000114244
634	0.262187	4.48204e-15		0.262301	4.48399e-15			0.000113955
635	0.262073	4.2616e-15		0.262187	4.26345e-15			0.000113666
636	0.26196	4.052e-15		0.262073	4.05376e-15			0.000113378
637	0.261847	3.85272e-15		0.26196	3.85439e-15			0.000113091
638	0.261734	3.66324e-15		0.261847	3.66482e-15			0.000112805
639	0.261621	3.48309e-15		0.261734	3.48458e-15			0.000112519
640	0.261509	3.31179e-15		0.261621	3.31321e-15			0.000112234
641	0.261397	3.14893e-15		0.261509	3.15028e-15			0.00011195
642	0.261285	2.99407e-15		0.261397	2.99535e-15			0.000111666
643	0.261174	2.84684e-15		0.261285	2.84805e-15			0.000111384
644	0.261063	2.70684e-15		0.261174	2.70799e-15			0.000111102
645	0.260952	2.57373e-15		0.261063	2.57483e-15			0.00011082
646	0.260842	2.44717e-15		0.260952	2.44821e-15			0.00011054
647	0.260731	2.32684e-15		0.260842	2.32782e-15			0.00011026
648	0.260621	2.21243e-15		0.260731	2.21336e-15			0.000109981
649	0.260512	2.10364e-15		0.260621	2.10452e-15			0.000109702
650	0.260402	2.0002e-15		0.260512	2.00104e-15			0.000109424
651	0.260293	1.90185e-15		0.260402	1.90265e-15			0.000109147
652	0.260184	1.80834e-15		0.260293	1.8091e-15			0.000108871
653	0.260076	1.71943e-15		0.260184	1.72015e-15			0.000108595
654	0.259967	1.63489e-15		0.260076	1.63557e-15			0.00010832
655	0.259859	1.55451e-15		0.259967	1.55516e-15			0.000108046
656	0.259751	1.47808e-15		0.259859	1.4787e-15			0.000107772
657	0.259644	1.40541e-15		0.259751	1.406e-15			0.000107499
658	0.259537	1.33632e-15		0.259644	1.33687e-15			0.000107227
659	0.25943	1.27062e-15		0.259537	1.27115e-15			0.000106955
660	0.259323	1.20816e-15		0.25943	1.20865e-15			0.000106685
661	0.259217	1.14876e-15		0.259323	1.14923e-15			0.000106414
662	0.25911	1.09229e-15		0.259217	1.09274e-15			0.000106145
663	0.259005	1.03859e-15		0.25911	1.03902e-15			0.000105876
664	0.258899	9.87537e-16		0.259005	9.8794e-16			0.000105608
665	0.258794	9.38992e-16		0.258899	9.39375e-16			0.000105341
666	0.258689	8.92835e-16		0.258794	8.93197e-16			0.000105074
667	0.258584	8.48946e-16		0.258689	8.49291e-16			0.000104808
668	0.258479	8.07216e-16		0.258584	8.07543e-16			0.000104542
669	0.258375	7.67538e-16		0.258479	7.67848e-16			0.000104278
670	0.258271	7.29811e-16		0.258375	7.30105e-16			0.000104014
671	0.258167	6.93939e-16		0.258271	6.94218e-16			0.00010375
672	0.258064	6.5983e-16		0.258167	6.60095e-16			0.000103487
673	0.25796	6.27399e-16		0.258064	6.2765e-16			0.000103225
674	0.257858	5.96562e-16		0.25796	5.968e-16			0.000102964
675	0.257755	5.67242e-16		0.257858	5.67468e-16			0.000102703
676	0.257652	5.39362e-16		0.257755	5.39577e-16			0.000102443
677	0.25755	5.12854e-16		0.257652	5.13057e-16			0.000102184
678	0.257448	4.87649e-16		0.25755	4.87842e-16			0.000101925
679	0.257347	4.63683e-16		0.257448	4.63866e-16			0.000101667
680	0.257245	4.40895e-16		0.257347	4.41069e-16			0.000101409
681	0.257144	4.19227e-16		0.257245	4.19392e-16			0.000101153
682	0.257043	3.98625e-16		0.257144	3.98781e-16			0.000100897
683	0.256942	3.79035e-16		0.257043	3.79184e-16			0.000100641
684	0.256842	3.60408e-16		0.256942	3.60549e-16			0.000100386
685	0.256742	3.42697e-16		0.256842	3.42831e-16			0.000100132
686	0.256642	3.25857e-16		0.256742	3.25984e-16			9.98784e-05
687	0.256542	3.09845e-16		0.256642	3.09965e-16			9.96255e-05
688	0.256443	2.94619e-16		0.256542	2.94733e-16			9.93732e-05
689	0.256344	2.80142e-16		0.256443	2.8025e-16			9.91215e-05
690	0.256245	2.66377e-16		0.256344	2.66479e-16			9.88705e-05
691	0.256146	2.53288e-16		0.256245	2.53385e-16			9.86202e-05
692	0.256048	2.40842e-16		0.256146	2.40935e-16			9.83704e-05
693	0.25595	2.29008e-16		0.256048	2.29096e-16			9.81213e-05
694	0.255852	2.17756e-16		0.25595	2.17839e-16			9.78729e-05
695	0.255754	2.07057e-16		0.255852	2.07136e-16			9.7625e-05
696	0.255657	1.96884e-16		0.255754	1.96959e-16			9.73778e-05
697	0.25556	1.8721e-16		0.255657	1.87282e-16			9.71312e-05
698	0.255463	1.78013e-16		0.25556	1.7808e-16			9.68852e-05
699	0.255366	1.69267e-16		0.255463	1.69331e-16			9.66399e-05
700	0.25527	1.60951e-16		0.255366	1.61012e-16			9.63952e-05
701	0.255174	1.53043e-16		0.25527	1.53101e-16			9.61511e-05
702	0.255078	1.45525e-16		0.255174	1.45579e-16			9.59076e-05
703	0.254982	1.38375e-16		0.255078	1.38427e-16			9.56647e-05
704	0.254887	1.31578e-16		0.254982	1.31627e-16			9.54225e-05
705	0.254792	1.25114e-16		0.254887	1.2516e-16			9.51808e-05
706	0.254697	1.18967e-16		0.254792	1.19012e-16			9.49398e-05
707	0.254602	1.13123e-16		0.254697	1.13165e-16			9.46994e-05
708	0.254508	1.07566e-16		0.254602	1.07606e-16			9.44596e-05
709	0.254413	1.02282e-16		0.254508	1.0232e-16			9.42204e-05
710	0.254319	9.7258e-17		0.254413	9.7294e-17			9.39818e-05
711	0.254226	9.24806e-17		0.254319	9.25147e-17			9.37438e-05
712	0.254132	8.79379e-17		0.254226	8.79703e-17			9.35064e-05
713	0.254039	8.36184e-17		0.254132	8.36491e-17			9.32696e-05
714	0.253946	7.95112e-17		0.254039	7.95403e-17			9.30335e-05
715	0.253853	7.56057e-17		0.253946	7.56334e-17			9.27979e-05
716	0.253761	7.18922e-17		0.253853	7.19184e-17			9.25629e-05
717	0.253668	6.83611e-17		0.253761	6.8386e-17			9.23285e-05
718	0.253576	6.50035e-17		0.253668	6.50271e-17			9.20947e-05
719	0.253484	6.18108e-17		0.253576	6.18332e-17			9.18615e-05
720	0.253393	5.8775e-17		0.253484	5.87962e-17			9.16288e-05
721	0.253301	5.58883e-17		0.253393	5.59085e-17			9.13968e-05
722	0.25321	5.31435e-17		0.253301	5.31626e-17			9.11654e-05
723	0.253119	5.05335e-17		0.25321	5.05517e-17			9.09345e-05
724	0.253028	4.80517e-17		0.253119	4.8069e-17			9.07042e-05
725	0.252938	4.56919e-17		0.253028	4.57082e-17			9.04746e-05
726	0.252848	4.3448e-17		0.252938	4.34635e-17			9.02454e-05
727	0.252758	4.13143e-17		0.252848	4.1329e-17			9.00169e-05
728	0.252668	3.92854e-17		0.252758	3.92993e-17			8.9789e-05
729	0.252578	3.73562e-17		0.252668	3.73694e-17			8.95616e-05
730	0.252489	3.55217e-17		0.252578	3.55343e-17			8.93348e-05
731	0.2524	3.37774e-17		0.252489	3.37893e-17			8.91086e-05
732	0.252311	3.21187e-17		0.2524	3.213e-17			8.88829e-05
733	0.252222	3.05415e-17		0.252311	3.05523e-17			8.86579e-05
734	0.252134	2.90418e-17		0.252222	2.9052e-17			8.84333e-05
735	0.252046	2.76158e-17		0.252134	2.76254e-17			8.82094e-05
736	0.251958	2.62598e-17		0.252046	2.62689e-17			8.7986e-05
737	0.25187	2.49704e-17		0.251958	2.49791e-17			8.77632e-05
738	0.251782	2.37443e-17		0.25187	2.37525e-17			8.7541e-05
739	0.251695	2.25784e-17		0.251782	2.25863e-17			8.73193e-05
740	0.251608	2.14698e-17		0.251695	2.14773e-17			8.70982e-05
741	0.251521	2.04157e-17		0.251608	2.04227e-17			8.68776e-05
742	0.251434	1.94133e-17		0.251521	1.942e-17			8.66576e-05
743	0.251348	1.84602e-17		0.251434	1.84665e-17			8.64382e-05
744	0.251262	1.75538e-17		0.251348	1.75598e-17			8.62193e-05
745	0.251176	1.6692e-17		0.251262	1.66977e-17			8.6001e-05
746	0.25109	1.58725e-17		0.251176	1.58779e-17			8.57832e-05
747	0.251004	1.50932e-17		0.25109	1.50984e-17			8.5566e-05
748	0.250919	1.43523e-17		0.251004	1.43571e-17			8.53493e-05
749	0.250834	1.36477e-17		0.250919	1.36523e-17			8.51332e-05
750	0.250749	1.29777e-17		0.250834	1.2982e-17			8.49176e-05
751	0.250664	1.23406e-17		0.250749	1.23447e-17			8.47025e-05
752	0.25058	1.17347e-17		0.250664	1.17387e-17			8.44881e-05
753	0.250496	1.11587e-17		0.25058	1.11624e-17			8.42741e-05
754	0.250412	1.06109e-17		0.250496	1.06145e-17			8.40607e-05
755	0.250328	1.009e-17		0.250412	1.00934e-17			8.38478e-05
756	0.250244	9.59472e-18		0.250328	9.59793e-18			8.36355e-05
757	0.250161	9.12374e-18		0.250244	9.12678e-18			8.34237e-05
758	0.250077	8.67588e-18		0.250161	8.67877e-18			8.32125e-05
759	0.249994	8.25001e-18		0.250077	8.25275e-18			8.30017e-05
760	0.249912	7.84506e-18		0.249994	7.84766e-18			8.27916e-05
761	0.249829	7.45998e-18		0.249912	7.46245e-18			8.25819e-05
762	0.249747	7.09382e-18		0.249829	7.09616e-18			8.23728e-05
763	0.249664	6.74563e-18		0.249747	6.74785e-18			8.21642e-05
764	0.249583	6.41453e-18		0.249664	6.41664e-18			8.19561e-05
765	0.249501	6.09969e-18		0.249583	6.10169e-18			8.17486e-05
766	0.249419	5.80031e-18		0.249501	5.80221e-18			8.15416e-05
767	0.249338	5.51563e-18		0.249419	5.51743e-18			8.13351e-05
768	0.249257	5.24492e-18		0.249338	5.24663e-18			8.11291e-05
769	0.249176	4.9875e-18		0.249257	4.98912e-18			8.09237e-05
770	0.249095	4.74272e-18		0.249176	4.74426e-18			8.07188e-05
771	0.249015	4.50996e-18		0.249095	4.51142e-18			8.05144e-05
772	0.248934	4.28862e-18		0.249015	4.29001e-18			8.03105e-05
773	0.248854	4.07815e-18		0.248934	4.07946e-18			8.01071e-05
774	0.248774	3.87801e-18		0.248854	3.87926e-18			7.99043e-05
775	0.248695	3.6877e-18		0.248774	3.68888e-18			7.97019e-05
776	0.248615	3.50672e-18		0.248695	3.50785e-18			7.95001e-05
777	0.248536	3.33464e-18		0.248615	3.3357e-18			7.92988e-05
778	0.248457	3.17099e-18		0.248536	3.172e-18			7.9098e-05
779	0.248378	3.01538e-18		0.248457	3.01634e-18			7.88977e-05
780	0.248299	2.86741e-18		0.248378	2.86832e-18			7.86979e-05
781	0.248221	2.72671e-18		0.248299	2.72757e-18			7.84986e-05
782	0.248142	2.5929e-18		0.248221	2.59372e-18			7.82998e-05
783	0.248064	2.46567e-18		0.248142	2.46645e-18			7.81015e-05
784	0.247986	2.34468e-18		0.248064	2.34542e-18			7.79038e-05
785	0.247909	2.22963e-18		0.247986	2.23033e-18			7.77065e-05
786	0.247831	2.12023e-18		0.247909	2.12089e-18			7.75097e-05
787	0.247754	2.01619e-18		0.247831	2.01682e-18			7.73134e-05
788	0.247677	1.91727e-18		0.247754	1.91786e-18			7.71176e-05
789	0.2476	1.82319e-18		0.247677	1.82376e-18			7.69224e-05
790	0.247523	1.73374e-18		0.2476	1.73428e-18			7.67276e-05
791	0.247446	1.64867e-18		0.247523	1.64918e-18			7.65333e-05
792	0.24737	1.56778e-18		0.247446	1.56827e-18			7.63395e-05
793	0.247294	1.49086e-18		0.24737	1.49132e-18			7.61462e-05
794	0.247218	1.41772e-18		0.247294	1.41815e-18			7.59533e-05
795	0.247142	1.34816e-18		0.247218	1.34857e-18			7.5761e-05
796	0.247067	1.28202e-18		0.247142	1.28241e-18			7.55692e-05
797	0.246991	1.21912e-18		0.247067	1.21949e-18			7.53778e-05
798	0.246916	1.15931e-18		0.246991	1.15966e-18			7.51869e-05
799	0.246841	1.10244e-18		0.246916	1.10277e-18			7.49965e-05
800	0.246766	1.04835e-18		0.246841	1.04867e-18			7.48066e-05
801	0.246692	9.96921e-19		0.246766	9.97222e-19			7.46172e-05
802	0.246617	9.48014e-19		0.246692	9.483e-19			7.44282e-05
803	0.246543	9.01507e-19		0.246617	9.01779e-19			7.42397e-05
804	0.246469	8.57283e-19		0.246543	8.5754e-19			7.40518e-05
805	0.246395	8.15228e-19		0.246469	8.15473e-19			7.38642e-05
806	0.246321	7.75237e-19		0.246395	7.75469e-19			7.36772e-05
807	0.246248	7.37208e-19		0.246321	7.37428e-19			7.34906e-05
808	0.246175	7.01046e-19		0.246248	7.01254e-19			7.33045e-05
809	0.246102	6.66657e-19		0.246175	6.66855e-19			7.31189e-05
810	0.246029	6.33956e-19		0.246102	6.34144e-19			7.29337e-05
811	0.245956	6.02859e-19		0.246029	6.03038e-19			7.2749e-05
812	0.245883	5.73288e-19		0.245956	5.73457e-19			7.25648e-05
813	0.245811	5.45168e-19		0.245883	5.45329e-19			7.23811e-05
814	0.245739	5.18428e-19		0.245811	5.1858e-19			7.21978e-05
815	0.245667	4.92999e-19		0.245739	4.93144e-19			7.20149e-05
816	0.245595	4.68818e-19		0.245667	4.68955e-19			7.18326e-05
817	0.245523	4.45824e-19		0.245595	4.45954e-19			7.16507e-05
818	0.245452	4.23957e-19		0.245523	4.2408e-19			7.14692e-05
819	0.24538	4.03163e-19		0.245452	4.0328e-19			7.12883e-05
820	0.245309	3.8339e-19		0.24538	3.83501e-19			7.11077e-05
821	0.245238	3.64586e-19		0.245309	3.64691e-19			7.09277e-05
822	0.245168	3.46705e-19		0.245238	3.46805e-19			7.07481e-05
823	0.245097	3.29701e-19		0.245168	3.29796e-19			7.05689e-05
824	0.245027	3.13531e-19		0.245097	3.13621e-19			7.03902e-05
825	0.244957	2.98155e-19		0.245027	2.9824e-19			7.0212e-05
826	0.244886	2.83532e-19		0.244957	2.83613e-19			7.00342e-05
827	0.244817	2.69627e-19		0.244886	2.69704e-19			6.98568e-05
828	0.244747	2.56405e-19		0.244817	2.56478e-19			6.96799e-05
829	0.244677	2.4383e-19		0.244747	2.439e-19			6.95035e-05
830	0.244608	2.31873e-19		0.244677	2.31939e-19			6.93275e-05
831	0.244539	2.20502e-19		0.244608	2.20564e-19			6.91519e-05
832	0.24447	2.09689e-19		0.244539	2.09748e-19			6.89768e-05
833	0.244401	1.99406e-19		0.24447	1.99462e-19			6.88021e-05
834	0.244333	1.89628e-19		0.244401	1.89681e-19			6.86279e-05
835	0.244264	1.80329e-19		0.244333	1.80379e-19			6.84541e-05
836	0.244196	1.71486e-19		0.244264	1.71534e-19			6.82808e-05
837	0.244128	1.63077e-19		0.244196	1.63123e-19			6.81079e-05
838	0.24406	1.55081e-19		0.244128	1.55124e-19			6.79354e-05
839	0.243992	1.47476e-19		0.24406	1.47517e-19			6.77634e-05
840	0.243924	1.40245e-19		0.243992	1.40284e-19			6.75918e-05
841	0.243857	1.33368e-19		0.243924	1.33405e-19			6.74206e-05
842	0.24379	1.26829e-19		0.243857	1.26864e-19			6.72499e-05
843	0.243723	1.2061e-19		0.24379	1.20643e-19			6.70796e-05
844	0.243656	1.14696e-19		0.243723	1.14728e-19			6.69097e-05
845	0.243589	1.09073e-19		0.243656	1.09103e-19			6.67403e-05
846	0.243522	1.03725e-19		0.243589	1.03753e-19			6.65713e-05
847	0.243456	9.86391e-20		0.243522	9.8666e-20			6.64027e-05
848	0.24339	9.38029e-20		0.243456	9.38284e-20			6.62346e-05
849	0.243324	8.92039e-20		0.24339	8.92281e-20			6.60668e-05
850	0.243258	8.48304e-20		0.243324	8.48534e-20			6.58995e-05
851	0.243192	8.06713e-20		0.243258	8.06931e-20			6.57327e-05
852	0.243127	7.67163e-20		0.243192	7.6737e-20			6.55662e-05
853	0.243061	7.29551e-20		0.243127	7.29748e-20			6.54002e-05
854	0.242996	6.93784e-20		0.243061	6.93971e-20			6.52346e-05
855	0.242931	6.59771e-20		0.242996	6.59948e-20			6.50694e-05
856	0.242866	6.27426e-20		0.242931	6.27594e-20			6.49046e-05
857	0.242801	5.96667e-20		0.242866	5.96826e-20			6.47402e-05
858	0.242737	5.67417e-20		0.242801	5.67568e-20			6.45763e-05
859	0.242672	5.396e-20		0.242737	5.39743e-20			6.44128e-05
860	0.242608	5.13148e-20		0.242672	5.13284e-20			6.42497e-05
861	0.242544	4.87992e-20		0.242608	4.88121e-20			6.4087e-05
862	0.24248	4.6407e-20		0.242544	4.64193e-20			6.39247e-05
863	0.242416	4.41321e-20		0.24248	4.41437e-20			6.37628e-05
864	0.242353	4.19687e-20		0.242416	4.19798e-20			6.36013e-05
865	0.242289	3.99115e-20		0.242353	3.99219e-20			6.34403e-05
866	0.242226	3.7955e-20		0.242289	3.7965e-20			6.32796e-05
867	0.242163	3.60945e-20		0.242226	3.61039e-20			6.31194e-05
868	0.2421	3.43253e-20		0.242163	3.43342e-20			6.29595e-05
869	0.242037	3.26427e-20		0.2421	3.26512e-20			6.28001e-05
870	0.241974	3.10427e-20		0.242037	3.10507e-20			6.26411e-05
871	0.241912	2.95211e-20		0.241974	2.95287e-20			6.24825e-05
872	0.24185	2.80741e-20		0.241912	2.80813e-20			6.23242e-05
873	0.241787	2.6698e-20		0.24185	2.67049e-20			6.21664e-05
874	0.241725	2.53895e-20		0.241787	2.5396e-20			6.2009e-05
875	0.241664	2.4145e-20		0.241725	2.41512e-20			6.1852e-05
876	0.241602	2.29616e-20		0.241664	2.29674e-20			6.16953e-05
877	0.24154	2.18362e-20		0.241602	2.18417e-20			6.15391e-05
878	0.241479	2.07659e-20		0.24154	2.07712e-20			6.13833e-05
879	0.241418	1.97482e-20		0.241479	1.97532e-20			6.12278e-05
880	0.241357	1.87803e-20		0.241418	1.8785e-20			6.10728e-05
881	0.241296	1.78598e-20		0.241357	1.78644e-20			6.09181e-05
882	0.241235	1.69845e-20		0.241296	1.69888e-20			6.07639e-05
883	0.241174	1.61521e-20		0.241235	1.61562e-20			6.061e-05
884	0.241114	1.53605e-20		0.241174	1.53644e-20			6.04565e-05
885	0.241054	1.46077e-20		0.241114	1.46114e-20			6.03034e-05
886	0.240993	1.38918e-20		0.241054	1.38953e-20			6.01507e-05
887	0.240933	1.3211e-20		0.240993	1.32143e-20			5.99984e-05
888	0.240874	1.25636e-20		0.240933	1.25667e-20			5.98465e-05
889	0.240814	1.19479e-20		0.240874	1.19509e-20			5.96949e-05
890	0.240754	1.13624e-20		0.240814	1.13652e-20			5.95438e-05
891	0.240695	1.08056e-20		0.240754	1.08082e-20			5.9393e-05
892	0.240636	1.0276e-20		0.240695	1.02786e-20			5.92426e-05
893	0.240577	9.77248e-21		0.240636	9.77488e-21			5.90926e-05
894	0.240518	9.29359e-21		0.240577	9.29587e-21			5.89429e-05
895	0.240459	8.83818e-21		0.240518	8.84034e-21			5.87937e-05
896	0.2404	8.40508e-21		0.240459	8.40713e-21			5.86448e-05
897	0.240342	7.99322e-21		0.2404	7.99516e-21			5.84963e-05
898	0.240283	7.60154e-21		0.240342	7.60338e-21			5.83481e-05
899	0.240225	7.22905e-21		0.240283	7.23081e-21			5.82004e-05
900	0.240167	6.87483e-21		0.240225	6.87649e-21			5.8053e-05
901	0.240109	6.53796e-21		0.240167	6.53954e-21			5.7906e-05
902	0.240051	6.21761e-21		0.240109	6.2191e-21			5.77594e-05
903	0.239994	5.91295e-21		0.240051	5.91437e-21			5.76131e-05
904	0.239936	5.62322e-21		0.239994	5.62457e-21			5.74672e-05
905	0.239879	5.3477e-21		0.239936	5.34898e-21			5.73217e-05
906	0.239822	5.08568e-21		0.239879	5.08689e-21			5.71765e-05
907	0.239765	4.83649e-21		0.239822	4.83764e-21			5.70317e-05
908	0.239708	4.59952e-21		0.239765	4.60062e-21			5.68873e-05
909	0.239651	4.37417e-21		0.239708	4.3752e-21			5.67433e-05
910	0.239595	4.15985e-21		0.239651	4.16084e-21			5.65996e-05
911	0.239538	3.95604e-21		0.239595	3.95698e-21			5.64562e-05
912	0.239482	3.76222e-21		0.239538	3.7631e-21			5.63133e-05
913	0.239426	3.57789e-21		0.239482	3.57873e-21			5.61707e-05
914	0.23937	3.4026e-21		0.239426	3.4034e-21			5.60284e-05
915	0.239314	3.2359e-21		0.23937	3.23666e-21			5.58866e-05
916	0.239258	3.07737e-21		0.239314	3.07808e-21			5.5745e-05
917	0.239202	2.9266e-21		0.239258	2.92728e-21			5.56039e-05
918	0.239147	2.78322e-21		0.239202	2.78387e-21			5.54631e-05
919	0.239092	2.64687e-21		0.239147	2.64748e-21			5.53226e-05
920	0.239036	2.5172e-21		0.239092	2.51778e-21			5.51825e-05
921	0.238981	2.39388e-21		0.239036	2.39444e-21			5.50428e-05
922	0.238926	2.27661e-21		0.238981	2.27713e-21			5.49034e-05
923	0.238872	2.16508e-21		0.238926	2.16558e-21			5.47644e-05
924	0.238817	2.05902e-21		0.238872	2.05949e-21			5.46257e-05
925	0.238763	1.95815e-21		0.238817	1.9586e-21			5.44874e-05
926	0.238708	1.86223e-21		0.238763	1.86265e-21			5.43494e-05
927	0.238654	1.771e-21		0.238708	1.77141e-21			5.42118e-05
928	0.2386	1.68425e-21		0.238654	1.68463e-21			5.40745e-05
929	0.238546	1.60175e-21		0.2386	1.60211e-21			5.39376e-05
930	0.238492	1.52328e-21		0.238546	1.52363e-21			5.3801e-05
931	0.238439	1.44867e-21		0.238492	1.44899e-21			5.36647e-05
932	0.238385	1.3777e-21		0.238439	1.37801e-21			5.35288e-05
933	0.238332	1.31022e-21		0.238385	1.31051e-21			5.33933e-05
934	0.238278	1.24604e-21		0.238332	1.24632e-21			5.32581e-05
935	0.238225	1.18501e-21		0.238278	1.18527e-21			5.31232e-05
936	0.238172	1.12696e-21		0.238225	1.12721e-21			5.29887e-05
937	0.238119	1.07176e-21		0.238172	1.072e-21			5.28545e-05
938	0.238067	1.01927e-21		0.238119	1.01949e-21			5.27207e-05
939	0.238014	9.69341e-22		0.238067	9.69556e-22			5.25872e-05
940	0.237962	9.21863e-22		0.238014	9.22066e-22			5.2454e-05
941	0.237909	8.7671e-22		0.237962	8.76903e-22			5.23212e-05
942	0.237857	8.3377e-22		0.237909	8.33953e-22			5.21887e-05
943	0.237805	7.92933e-22		0.237857	7.93106e-22			5.20565e-05
944	0.237753	7.54096e-22		0.237805	7.54261e-22			5.19247e-05
945	0.237701	7.17162e-22		0.237753	7.17318e-22			5.17932e-05
946	0.23765	6.82038e-22		0.237701	6.82186e-22			5.16621e-05
947	0.237598	6.48633e-22		0.23765	6.48774e-22			5.15312e-05
948	0.237547	6.16866e-22		0.237598	6.16999e-22			5.14007e-05
949	0.237495	5.86654e-22		0.237547	5.86781e-22			5.12706e-05
950	0.237444	5.57923e-22		0.237495	5.58043e-22			5.11407e-05
951	0.237393	5.30598e-22		0.237444	5.30712e-22			5.10112e-05
952	0.237342	5.04613e-22		0.237393	5.04721e-22			5.08821e-05
953	0.237292	4.799e-22		0.237342	4.80002e-22			5.07532e-05
954	0.237241	4.56397e-22		0.237292	4.56495e-22			5.06247e-05
955	0.237191	4.34046e-22		0.237241	4.34139e-22			5.04965e-05
956	0.23714	4.1279e-22		0.237191	4.12877e-22			5.03686e-05
957	0.23709	3.92575e-22		0.23714	3.92658e-22			5.02411e-05
958	0.23704	3.7335e-22		0.23709	3.73429e-22			5.01139e-05
959	0.23699	3.55066e-22		0.23704	3.55141e-22			4.9987e-05
960	0.23694	3.37678e-22		0.23699	3.37749e-22			4.98604e-05
961	0.23689	3.21142e-22		0.23694	3.2121e-22			4.97341e-05
962	0.236841	3.05416e-22		0.23689	3.0548e-22			4.96082e-05
963	0.236791	2.9046e-22		0.236841	2.90521e-22			4.94826e-05
964	0.236742	2.76236e-22		0.236791	2.76294e-22			4.93572e-05
965	0.236693	2.6271e-22		0.236742	2.62764e-22			4.92323e-05
966	0.236643	2.49845e-22		0.236693	2.49897e-22			4.91076e-05
967	0.236595	2.37611e-22		0.236643	2.3766e-22			4.89832e-05
968	0.236546	2.25976e-22		0.236595	2.26023e-22			4.88592e-05
969	0.236497	2.14911e-22		0.236546	2.14955e-22			4.87355e-05
970	0.236448	2.04387e-22		0.236497	2.04429e-22			4.86121e-05
971	0.2364	1.94379e-22		0.236448	1.94419e-22			4.8489e-05
972	0.236351	1.84861e-22		0.2364	1.84899e-22			4.83662e-05
973	0.236303	1.7581e-22		0.236351	1.75846e-22			4.82437e-05
974	0.236255	1.67201e-22		0.236303	1.67235e-22			4.81215e-05
975	0.236207	1.59015e-22		0.236255	1.59047e-22			4.79997e-05
976	0.236159	1.51229e-22		0.236207	1.51259e-22			4.78781e-05
977	0.236111	1.43824e-22		0.236159	1.43853e-22			4.77569e-05
978	0.236064	1.36782e-22		0.236111	1.3681e-22			4.76359e-05
979	0.236016	1.30085e-22		0.236064	1.30111e-22			4.75153e-05
980	0.235969	1.23716e-22		0.236016	1.23741e-22			4.7395e-05
981	0.235922	1.17659e-22		0.235969	1.17682e-22			4.7275e-05
982	0.235874	1.11898e-22		0.235922	1.1192e-22			4.71553e-05
983	0.235827	1.06419e-22		0.235874	1.06441e-22			4.70359e-05
984	0.235781	1.01209e-22		0.235827	1.01229e-22			4.69167e-05
985	0.235734	9.62539e-23		0.235781	9.6273e-23			4.67979e-05
986	0.235687	9.15414e-23		0.235734	9.15596e-23			4.66794e-05
987	0.23564	8.70597e-23		0.235687	8.70769e-23			4.65612e-05
988	0.235594	8.27974e-23		0.23564	8.28138e-23			4.64433e-05
989	0.235548	7.87439e-23		0.235594	7.87594e-23			4.63257e-05
990	0.235502	7.48888e-23		0.235548	7.49035e-23			4.62084e-05
991	0.235455	7.12225e-23		0.235502	7.12364e-23			4.60914e-05
992	0.235409	6.77357e-23		0.235455	6.77489e-23			4.59747e-05
993	0.235364	6.44196e-23		0.235409	6.44322e-23			4.58583e-05
994	0.235318	6.12659e-23		0.235364	6.12778e-23			4.57421e-05
995	0.235272	5.82667e-23		0.235318	5.8278e-23			4.56263e-05
996	0.235227	5.54142e-23		0.235272	5.5425e-23			4.55108e-05
997	0.235181	5.27015e-23		0.235227	5.27117e-23			4.53955e-05
998	0.235136	5.01216e-23		0.235181	5.01312e-23			4.52806e-05
999	0.235091	4.76679e-23		0.235136	4.76771e-23			4.51659e-05
1000	0.235046	4.53345e-23		0.235091	4.53431e-23			4.50515e-05
1001	0.235001	4.31152e-23		0.235046	4.31235e-23			4.49374e-05
1002	0.234956	4.10046e-23		0.235001	4.10125e-23			4.48236e-05
1003	0.234911	3.89974e-23		0.234956	3.90048e-23			4.47101e-05
1004	0.234867	3.70884e-23		0.234911	3.70955e-23			4.45969e-05

## Sheet: SCC=30.81 rising 1.7%; r=5%
	discount rate	0.05
	SCC growth rate	0.017		N with formula	30.8058
	Net discount rate	0.033
	Initial carbon Price	30.8058
	Initial carbon rent	1
				Delay years (τ)	1
	Instant release			Delay τ years
	ton years (year 0-100)	53.0661		ton years (year 0-100)	52.6566
	Discounted Emission Value (year 0-100)	18.6896		Discounted Emission Value (year 0-100)	18.0682
	100d1 value (C8-F8)	0.621301		N 100d (C8/C9)	30.0813
	Discounted Emission Value (year 0-1000)	19.1165		Discounted Emission Value (year 0-1000)	18.496
	1000d1 value	0.62055		N 1000d	30.8058
	Scenario 1	Scenario 2		Scenario 3	Scenario 4
Year	Carbon	Discounted Carbon Value		Carbon	Discounted Carbon Value
0	1	1		0	0
1	0.934525	0.904189		1	0.967539
2	0.881134	0.824857		0.934525	0.874838
3	0.837359	0.758431		0.881134	0.798081
4	0.801242	0.702161		0.837359	0.733812
5	0.771231	0.653922		0.801242	0.679368
6	0.746095	0.612074		0.771231	0.632695
7	0.724857	0.575348		0.746095	0.592205
8	0.706741	0.542758		0.724857	0.556671
9	0.691132	0.513541		0.706741	0.52514
10	0.67754	0.4871		0.691132	0.496871
11	0.665578	0.462967		0.67754	0.471288
12	0.654938	0.440778		0.665578	0.447939
13	0.645373	0.420241		0.654938	0.426469
14	0.636688	0.401128		0.645373	0.406599
15	0.628729	0.383255		0.636688	0.388107
16	0.62137	0.366474		0.628729	0.370814
17	0.614513	0.350665		0.62137	0.354577
18	0.608079	0.335729		0.614513	0.339282
19	0.602004	0.321586		0.608079	0.324831
20	0.596238	0.308166		0.602004	0.311147
21	0.590739	0.295413		0.596238	0.298163
22	0.585475	0.283276		0.590739	0.285824
23	0.580418	0.271713		0.585475	0.274081
24	0.575546	0.260687		0.580418	0.262893
25	0.570843	0.250163		0.575546	0.252225
26	0.566292	0.240113		0.570843	0.242043
27	0.561883	0.23051		0.566292	0.232319
28	0.557604	0.221329		0.561883	0.223027
29	0.553447	0.212547		0.557604	0.214144
30	0.549404	0.204146		0.553447	0.205648
31	0.54547	0.196105		0.549404	0.197519
32	0.54164	0.188406		0.54547	0.189739
33	0.537907	0.181034		0.54164	0.18229
34	0.534269	0.173973		0.537907	0.175158
35	0.530721	0.167208		0.534269	0.168325
36	0.527259	0.160725		0.530721	0.16178
37	0.523882	0.154511		0.527259	0.155507
38	0.520585	0.148555		0.523882	0.149496
39	0.517367	0.142844		0.520585	0.143732
40	0.514225	0.137368		0.517367	0.138207
41	0.511156	0.132115		0.514225	0.132908
42	0.508158	0.127077		0.511156	0.127827
43	0.505229	0.122243		0.508158	0.122952
44	0.502368	0.117605		0.505229	0.118275
45	0.499572	0.113154		0.502368	0.113787
46	0.496839	0.108882		0.499572	0.109481
47	0.494168	0.104781		0.496839	0.105348
48	0.491557	0.100844		0.494168	0.10138
49	0.489004	0.0970641		0.491557	0.0975708
50	0.486509	0.0934339		0.489004	0.0939133
51	0.484068	0.0899474		0.486509	0.0904009
52	0.481681	0.0865985		0.484068	0.0870276
53	0.479347	0.0833813		0.481681	0.0837874
54	0.477063	0.0802903		0.479347	0.0806746
55	0.474829	0.0773201		0.477063	0.0776839
56	0.472643	0.0744658		0.474829	0.0748102
57	0.470504	0.0717225		0.472643	0.0720486
58	0.468411	0.0690856		0.470504	0.0693943
59	0.466362	0.0665506		0.468411	0.066843
60	0.464357	0.0641134		0.466362	0.0643903
61	0.462394	0.06177		0.464357	0.0620322
62	0.460472	0.0595164		0.462394	0.0597648
63	0.45859	0.0573491		0.460472	0.0575844
64	0.456747	0.0552645		0.45859	0.0554874
65	0.454942	0.0532592		0.456747	0.0534705
66	0.453174	0.05133		0.454942	0.0515303
67	0.451442	0.0494739		0.453174	0.0496638
68	0.449744	0.047688		0.451442	0.0478679
69	0.448081	0.0459694		0.449744	0.04614
70	0.446452	0.0443153		0.448081	0.0444771
71	0.444854	0.0427234		0.446452	0.0428768
72	0.443288	0.041191		0.444854	0.0413365
73	0.441753	0.0397159		0.443288	0.0398539
74	0.440247	0.0382957		0.441753	0.0384266
75	0.438771	0.0369283		0.440247	0.0370525
76	0.437323	0.0356116		0.438771	0.0357295
77	0.435903	0.0343437		0.437323	0.0344556
78	0.434509	0.0331227		0.435903	0.0332289
79	0.433142	0.0319466		0.434509	0.0320474
80	0.4318	0.0308138		0.433142	0.0309096
81	0.430484	0.0297226		0.4318	0.0298136
82	0.429191	0.0286715		0.430484	0.0287578
83	0.427922	0.0276587		0.429191	0.0277407
84	0.426676	0.026683		0.427922	0.0267609
85	0.425452	0.0257427		0.426676	0.0258168
86	0.42425	0.0248367		0.425452	0.0249071
87	0.42307	0.0239636		0.42425	0.0240305
88	0.42191	0.0231222		0.42307	0.0231857
89	0.42077	0.0223112		0.42191	0.0223716
90	0.41965	0.0215295		0.42077	0.0215869
91	0.41855	0.0207759		0.41965	0.0208306
92	0.417467	0.0200495		0.41855	0.0201015
93	0.416403	0.0193493		0.417467	0.0193987
94	0.415357	0.0186741		0.416403	0.0187212
95	0.414328	0.0180232		0.415357	0.0180679
96	0.413316	0.0173955		0.414328	0.0174381
97	0.41232	0.0167903		0.413316	0.0168308
98	0.411341	0.0162067		0.41232	0.0162453
99	0.410377	0.0156438		0.411341	0.0156806
100	0.409428	0.015101		0.410377	0.015136
101	0.408494	0.0145775		0.409428	0.0146108
102	0.407574	0.0140725		0.408494	0.0141043
103	0.406668	0.0135854		0.407574	0.0136157
104	0.405777	0.0131156		0.406668	0.0131444
105	0.404898	0.0126624		0.405777	0.0126899
106	0.404033	0.0122252		0.404898	0.0122513
107	0.40318	0.0118034		0.404033	0.0118283
108	0.40234	0.0113964		0.40318	0.0114202
109	0.401512	0.0110038		0.40234	0.0110265
110	0.400696	0.0106249		0.401512	0.0106466
111	0.399891	0.0102594		0.400696	0.01028
112	0.399097	0.00990664		0.399891	0.00992633
113	0.398314	0.00956626		0.399097	0.00958505
114	0.397543	0.00923778		0.398314	0.00925572
115	0.396781	0.00892079		0.397543	0.00893791
116	0.39603	0.00861486		0.396781	0.00863121
117	0.395288	0.00831961		0.39603	0.00833521
118	0.394556	0.00803464		0.395288	0.00804954
119	0.393834	0.00775959		0.394556	0.00777382
120	0.393121	0.00749411		0.393834	0.0075077
121	0.392417	0.00723785		0.393121	0.00725084
122	0.391721	0.00699049		0.392417	0.0070029
123	0.391035	0.00675171		0.391721	0.00676357
124	0.390356	0.00652121		0.391035	0.00653254
125	0.389686	0.00629869		0.390356	0.00630952
126	0.389024	0.00608386		0.389686	0.00609422
127	0.388369	0.00587647		0.389024	0.00588637
128	0.387722	0.00567624		0.388369	0.00568571
129	0.387083	0.00548292		0.387722	0.00549198
130	0.38645	0.00529627		0.387083	0.00530494
131	0.385825	0.00511606		0.38645	0.00512435
132	0.385207	0.00494205		0.385825	0.00494998
133	0.384595	0.00477403		0.385207	0.00478162
134	0.38399	0.00461179		0.384595	0.00461906
135	0.383391	0.00445513		0.38399	0.00446209
136	0.382799	0.00430385		0.383391	0.00431051
137	0.382213	0.00415777		0.382799	0.00416414
138	0.381633	0.00401669		0.382213	0.0040228
139	0.381058	0.00388046		0.381633	0.0038863
140	0.38049	0.00374889		0.381058	0.00375449
141	0.379927	0.00362183		0.38049	0.00362719
142	0.379369	0.00349911		0.379927	0.00350426
143	0.378817	0.0033806		0.379369	0.00338553
144	0.37827	0.00326614		0.378817	0.00327086
145	0.377728	0.00315559		0.37827	0.00316011
146	0.377191	0.00304881		0.377728	0.00305315
147	0.376659	0.00294568		0.377191	0.00294984
148	0.376132	0.00284607		0.376659	0.00285006
149	0.37561	0.00274986		0.376132	0.00275369
150	0.375092	0.00265693		0.37561	0.0026606
151	0.374578	0.00256716		0.375092	0.00257068
152	0.374069	0.00248045		0.374578	0.00248383
153	0.373564	0.00239669		0.374069	0.00239993
154	0.373064	0.00231579		0.373564	0.00231889
155	0.372567	0.00223763		0.373064	0.00224061
156	0.372074	0.00216213		0.372567	0.00216499
157	0.371586	0.0020892		0.372074	0.00209194
158	0.371101	0.00201874		0.371586	0.00202138
159	0.37062	0.00195068		0.371101	0.00195321
160	0.370143	0.00188493		0.37062	0.00188736
161	0.369669	0.00182141		0.370143	0.00182374
162	0.369199	0.00176004		0.369669	0.00176228
163	0.368732	0.00170075		0.369199	0.00170291
164	0.368269	0.00164348		0.368732	0.00164554
165	0.367809	0.00158814		0.368269	0.00159013
166	0.367352	0.00153468		0.367809	0.00153659
167	0.366899	0.00148303		0.367352	0.00148486
168	0.366449	0.00143313		0.366899	0.00143489
169	0.366001	0.00138491		0.366449	0.0013866
170	0.365557	0.00133833		0.366001	0.00133996
171	0.365116	0.00129332		0.365557	0.00129489
172	0.364677	0.00124984		0.365116	0.00125134
173	0.364242	0.00120782		0.364677	0.00120926
174	0.363809	0.00116722		0.364242	0.00116861
175	0.363379	0.001128		0.363809	0.00112933
176	0.362951	0.0010901		0.363379	0.00109138
177	0.362527	0.00105348		0.362951	0.00105471
178	0.362104	0.00101809		0.362527	0.00101928
179	0.361685	0.000983904		0.362104	0.000985046
180	0.361268	0.000950867		0.361685	0.000951965
181	0.360853	0.000918945		0.361268	0.000920001
182	0.360441	0.000888099		0.360853	0.000889115
183	0.360031	0.000858293		0.360441	0.00085927
184	0.359623	0.000829491		0.360031	0.000830431
185	0.359218	0.00080166		0.359623	0.000802564
186	0.358815	0.000774767		0.359218	0.000775637
187	0.358414	0.000748779		0.358815	0.000749616
188	0.358015	0.000723667		0.358414	0.000724473
189	0.357619	0.0006994		0.358015	0.000700175
190	0.357224	0.00067595		0.357619	0.000676696
191	0.356832	0.000653289		0.357224	0.000654007
192	0.356441	0.000631391		0.356832	0.000632082
193	0.356053	0.000610229		0.356441	0.000610895
194	0.355666	0.000589779		0.356053	0.00059042
195	0.355282	0.000570017		0.355666	0.000570634
196	0.354899	0.00055092		0.355282	0.000551514
197	0.354518	0.000532464		0.354899	0.000533036
198	0.354139	0.000514629		0.354518	0.000515179
199	0.353762	0.000497393		0.354139	0.000497923
200	0.353387	0.000480736		0.353762	0.000481247
201	0.353013	0.000464639		0.353387	0.000465131
202	0.352641	0.000449083		0.353013	0.000449556
203	0.352271	0.000434049		0.352641	0.000434505
204	0.351903	0.00041952		0.352271	0.000419959
205	0.351536	0.000405478		0.351903	0.000405901
206	0.351171	0.000391908		0.351536	0.000392316
207	0.350807	0.000378794		0.351171	0.000379186
208	0.350445	0.000366119		0.350807	0.000366498
209	0.350085	0.00035387		0.350445	0.000354235
210	0.349726	0.000342032		0.350085	0.000342383
211	0.349368	0.000330591		0.349726	0.000330929
212	0.349012	0.000319534		0.349368	0.00031986
213	0.348658	0.000308847		0.349012	0.000309161
214	0.348305	0.000298519		0.348658	0.000298822
215	0.347954	0.000288537		0.348305	0.000288829
216	0.347603	0.00027889		0.347954	0.000279171
217	0.347255	0.000269566		0.347603	0.000269837
218	0.346908	0.000260555		0.347255	0.000260816
219	0.346562	0.000251846		0.346908	0.000252097
220	0.346217	0.000243428		0.346562	0.00024367
221	0.345874	0.000235292		0.346217	0.000235526
222	0.345532	0.000227429		0.345874	0.000227655
223	0.345191	0.00021983		0.345532	0.000220047
224	0.344852	0.000212485		0.345191	0.000212694
225	0.344514	0.000205386		0.344852	0.000205587
226	0.344177	0.000198524		0.344514	0.000198719
227	0.343842	0.000191893		0.344177	0.00019208
228	0.343507	0.000185483		0.343842	0.000185664
229	0.343174	0.000179288		0.343507	0.000179462
230	0.342842	0.0001733		0.343174	0.000173468
231	0.342512	0.000167513		0.342842	0.000167675
232	0.342182	0.000161919		0.342512	0.000162075
233	0.341854	0.000156513		0.342182	0.000156663
234	0.341527	0.000151287		0.341854	0.000151432
235	0.341201	0.000146237		0.341527	0.000146376
236	0.340876	0.000141355		0.341201	0.00014149
237	0.340552	0.000136636		0.340876	0.000136766
238	0.34023	0.000132076		0.340552	0.000132201
239	0.339908	0.000127668		0.34023	0.000127788
240	0.339588	0.000123407		0.339908	0.000123523
241	0.339268	0.000119289		0.339588	0.000119401
242	0.33895	0.000115308		0.339268	0.000115416
243	0.338633	0.000111461		0.33895	0.000111565
244	0.338316	0.000107742		0.338633	0.000107842
245	0.338001	0.000104147		0.338316	0.000104244
246	0.337687	0.000100673		0.338001	0.000100766
247	0.337374	9.73145e-05		0.337687	9.74048e-05
248	0.337062	9.40684e-05		0.337374	9.41555e-05
249	0.336751	9.09308e-05		0.337062	9.10148e-05
250	0.336441	8.78981e-05		0.336751	8.79791e-05
251	0.336132	8.49666e-05		0.336441	8.50448e-05
252	0.335824	8.21331e-05		0.336132	8.22085e-05
253	0.335517	7.93943e-05		0.335824	7.9467e-05
254	0.33521	7.6747e-05		0.335517	7.68171e-05
255	0.334905	7.4188e-05		0.33521	7.42556e-05
256	0.334601	7.17146e-05		0.334905	7.17798e-05
257	0.334298	6.93237e-05		0.334601	6.93866e-05
258	0.333995	6.70127e-05		0.334298	6.70734e-05
259	0.333694	6.47789e-05		0.333995	6.48374e-05
260	0.333393	6.26196e-05		0.333694	6.26761e-05
261	0.333094	6.05324e-05		0.333393	6.05869e-05
262	0.332795	5.8515e-05		0.333094	5.85675e-05
263	0.332497	5.65648e-05		0.332795	5.66155e-05
264	0.3322	5.46798e-05		0.332497	5.47286e-05
265	0.331904	5.28577e-05		0.3322	5.29048e-05
266	0.331609	5.10963e-05		0.331904	5.11418e-05
267	0.331315	4.93938e-05		0.331609	4.94377e-05
268	0.331022	4.77481e-05		0.331315	4.77904e-05
269	0.330729	4.61573e-05		0.331022	4.61981e-05
270	0.330438	4.46196e-05		0.330729	4.4659e-05
271	0.330147	4.31332e-05		0.330438	4.31712e-05
272	0.329857	4.16964e-05		0.330147	4.1733e-05
273	0.329568	4.03075e-05		0.329857	4.03429e-05
274	0.32928	3.8965e-05		0.329568	3.89991e-05
275	0.328992	3.76672e-05		0.32928	3.77001e-05
276	0.328706	3.64127e-05		0.328992	3.64445e-05
277	0.32842	3.52001e-05		0.328706	3.52307e-05
278	0.328135	3.40279e-05		0.32842	3.40574e-05
279	0.327851	3.28948e-05		0.328135	3.29233e-05
280	0.327568	3.17995e-05		0.327851	3.1827e-05
281	0.327285	3.07407e-05		0.327568	3.07672e-05
282	0.327004	2.97172e-05		0.327285	2.97428e-05
283	0.326723	2.87279e-05		0.327004	2.87525e-05
284	0.326443	2.77715e-05		0.326723	2.77953e-05
285	0.326163	2.6847e-05		0.326443	2.687e-05
286	0.325885	2.59533e-05		0.326163	2.59755e-05
287	0.325607	2.50894e-05		0.325885	2.51108e-05
288	0.32533	2.42543e-05		0.325607	2.4275e-05
289	0.325054	2.34471e-05		0.32533	2.3467e-05
290	0.324779	2.26667e-05		0.325054	2.2686e-05
291	0.324504	2.19124e-05		0.324779	2.1931e-05
292	0.32423	2.11832e-05		0.324504	2.12011e-05
293	0.323957	2.04783e-05		0.32423	2.04956e-05
294	0.323685	1.97969e-05		0.323957	1.98135e-05
295	0.323413	1.91382e-05		0.323685	1.91543e-05
296	0.323142	1.85014e-05		0.323413	1.85169e-05
297	0.322872	1.78859e-05		0.323142	1.79008e-05
298	0.322603	1.72908e-05		0.322872	1.73053e-05
299	0.322334	1.67156e-05		0.322603	1.67295e-05
300	0.322066	1.61596e-05		0.322334	1.6173e-05
301	0.321799	1.5622e-05		0.322066	1.5635e-05
302	0.321532	1.51024e-05		0.321799	1.51149e-05
303	0.321267	1.46001e-05		0.321532	1.46122e-05
304	0.321002	1.41145e-05		0.321267	1.41261e-05
305	0.320737	1.36451e-05		0.321002	1.36563e-05
306	0.320474	1.31913e-05		0.320737	1.32021e-05
307	0.320211	1.27526e-05		0.320474	1.27631e-05
308	0.319949	1.23285e-05		0.320211	1.23386e-05
309	0.319687	1.19186e-05		0.319949	1.19283e-05
310	0.319427	1.15223e-05		0.319687	1.15317e-05
311	0.319167	1.11392e-05		0.319427	1.11483e-05
312	0.318907	1.07688e-05		0.319167	1.07776e-05
313	0.318649	1.04108e-05		0.318907	1.04193e-05
314	0.318391	1.00647e-05		0.318649	1.00729e-05
315	0.318133	9.73012e-06		0.318391	9.73799e-06
316	0.317877	9.40667e-06		0.318133	9.41426e-06
317	0.317621	9.09399e-06		0.317877	9.10132e-06
318	0.317366	8.79172e-06		0.317621	8.79879e-06
319	0.317111	8.4995e-06		0.317366	8.50633e-06
320	0.316857	8.21701e-06		0.317111	8.2236e-06
321	0.316604	7.94392e-06		0.316857	7.95028e-06
322	0.316352	7.67992e-06		0.316604	7.68605e-06
323	0.3161	7.42471e-06		0.316352	7.43062e-06
324	0.315849	7.17798e-06		0.3161	7.18369e-06
325	0.315598	6.93946e-06		0.315849	6.94497e-06
326	0.315348	6.70888e-06		0.315598	6.7142e-06
327	0.315099	6.48597e-06		0.315348	6.4911e-06
328	0.31485	6.27048e-06		0.315099	6.27543e-06
329	0.314602	6.06215e-06		0.31485	6.06693e-06
330	0.314355	5.86076e-06		0.314602	5.86537e-06
331	0.314109	5.66606e-06		0.314355	5.67051e-06
332	0.313863	5.47784e-06		0.314109	5.48213e-06
333	0.313617	5.29588e-06		0.313863	5.30002e-06
334	0.313373	5.11997e-06		0.313617	5.12397e-06
335	0.313129	4.94991e-06		0.313373	4.95377e-06
336	0.312885	4.78551e-06		0.313129	4.78923e-06
337	0.312643	4.62657e-06		0.312885	4.63016e-06
338	0.3124	4.47292e-06		0.312643	4.47638e-06
339	0.312159	4.32438e-06		0.3124	4.32772e-06
340	0.311918	4.18077e-06		0.312159	4.184e-06
341	0.311678	4.04194e-06		0.311918	4.04506e-06
342	0.311438	3.90773e-06		0.311678	3.91074e-06
343	0.311199	3.77798e-06		0.311438	3.78088e-06
344	0.310961	3.65254e-06		0.311199	3.65534e-06
345	0.310723	3.53127e-06		0.310961	3.53397e-06
346	0.310486	3.41403e-06		0.310723	3.41664e-06
347	0.31025	3.30069e-06		0.310486	3.30321e-06
348	0.310014	3.19112e-06		0.31025	3.19355e-06
349	0.309778	3.08519e-06		0.310014	3.08753e-06
350	0.309544	2.98278e-06		0.309778	2.98504e-06
351	0.30931	2.88377e-06		0.309544	2.88595e-06
352	0.309076	2.78805e-06		0.30931	2.79016e-06
353	0.308843	2.69552e-06		0.309076	2.69755e-06
354	0.308611	2.60605e-06		0.308843	2.60801e-06
355	0.308379	2.51956e-06		0.308611	2.52146e-06
356	0.308148	2.43595e-06		0.308379	2.43778e-06
357	0.307918	2.35511e-06		0.308148	2.35688e-06
358	0.307688	2.27696e-06		0.307918	2.27866e-06
359	0.307459	2.20141e-06		0.307688	2.20305e-06
360	0.30723	2.12836e-06		0.307459	2.12995e-06
361	0.307002	2.05774e-06		0.30723	2.05927e-06
362	0.306774	1.98947e-06		0.307002	1.99095e-06
363	0.306548	1.92346e-06		0.306774	1.92489e-06
364	0.306321	1.85965e-06		0.306548	1.86103e-06
365	0.306095	1.79796e-06		0.306321	1.79929e-06
366	0.30587	1.73832e-06		0.306095	1.7396e-06
367	0.305646	1.68065e-06		0.30587	1.68189e-06
368	0.305422	1.6249e-06		0.305646	1.6261e-06
369	0.305198	1.57101e-06		0.305422	1.57216e-06
370	0.304975	1.5189e-06		0.305198	1.52001e-06
371	0.304753	1.46852e-06		0.304975	1.46959e-06
372	0.304531	1.41982e-06		0.304753	1.42085e-06
373	0.30431	1.37273e-06		0.304531	1.37373e-06
374	0.30409	1.32721e-06		0.30431	1.32817e-06
375	0.30387	1.2832e-06		0.30409	1.28413e-06
376	0.30365	1.24065e-06		0.30387	1.24154e-06
377	0.303431	1.19951e-06		0.30365	1.20037e-06
378	0.303213	1.15973e-06		0.303431	1.16057e-06
379	0.302995	1.12128e-06		0.303213	1.12209e-06
380	0.302778	1.08411e-06		0.302995	1.08488e-06
381	0.302561	1.04816e-06		0.302778	1.04891e-06
382	0.302345	1.01341e-06		0.302561	1.01414e-06
383	0.30213	9.79818e-07		0.302345	9.80517e-07
384	0.301915	9.47337e-07		0.30213	9.48011e-07
385	0.3017	9.15934e-07		0.301915	9.16585e-07
386	0.301486	8.85573e-07		0.3017	8.86201e-07
387	0.301273	8.5622e-07		0.301486	8.56826e-07
388	0.30106	8.2784e-07		0.301273	8.28425e-07
389	0.300848	8.00403e-07		0.30106	8.00967e-07
390	0.300636	7.73875e-07		0.300848	7.7442e-07
391	0.300425	7.48228e-07		0.300636	7.48754e-07
392	0.300214	7.23432e-07		0.300425	7.2394e-07
393	0.300004	6.99459e-07		0.300214	6.99948e-07
394	0.299794	6.7628e-07		0.300004	6.76753e-07
395	0.299585	6.53871e-07		0.299794	6.54327e-07
396	0.299377	6.32205e-07		0.299585	6.32645e-07
397	0.299169	6.11258e-07		0.299377	6.11683e-07
398	0.298961	5.91006e-07		0.299169	5.91416e-07
399	0.298755	5.71425e-07		0.298961	5.71821e-07
400	0.298548	5.52494e-07		0.298755	5.52876e-07
401	0.298342	5.3419e-07		0.298548	5.34559e-07
402	0.298137	5.16494e-07		0.298342	5.1685e-07
403	0.297932	4.99385e-07		0.298137	4.99728e-07
404	0.297728	4.82842e-07		0.297932	4.83174e-07
405	0.297524	4.66849e-07		0.297728	4.67169e-07
406	0.297321	4.51386e-07		0.297524	4.51694e-07
407	0.297118	4.36435e-07		0.297321	4.36733e-07
408	0.296916	4.21981e-07		0.297118	4.22268e-07
409	0.296714	4.08005e-07		0.296916	4.08283e-07
410	0.296513	3.94493e-07		0.296714	3.94761e-07
411	0.296312	3.81429e-07		0.296513	3.81687e-07
412	0.296112	3.68798e-07		0.296312	3.69047e-07
413	0.295912	3.56586e-07		0.296112	3.56826e-07
414	0.295713	3.44778e-07		0.295912	3.4501e-07
415	0.295515	3.33362e-07		0.295713	3.33586e-07
416	0.295317	3.22324e-07		0.295515	3.22541e-07
417	0.295119	3.11653e-07		0.295317	3.11861e-07
418	0.294922	3.01334e-07		0.295119	3.01536e-07
419	0.294725	2.91358e-07		0.294922	2.91553e-07
420	0.294529	2.81713e-07		0.294725	2.819e-07
421	0.294333	2.72387e-07		0.294529	2.72568e-07
422	0.294138	2.6337e-07		0.294333	2.63545e-07
423	0.293944	2.54652e-07		0.294138	2.54821e-07
424	0.293749	2.46223e-07		0.293944	2.46386e-07
425	0.293556	2.38073e-07		0.293749	2.3823e-07
426	0.293363	2.30193e-07		0.293556	2.30345e-07
427	0.29317	2.22575e-07		0.293363	2.22721e-07
428	0.292978	2.15208e-07		0.29317	2.1535e-07
429	0.292786	2.08086e-07		0.292978	2.08222e-07
430	0.292595	2.012e-07		0.292786	2.01331e-07
431	0.292404	1.94542e-07		0.292595	1.94669e-07
432	0.292214	1.88104e-07		0.292404	1.88227e-07
433	0.292024	1.8188e-07		0.292214	1.81998e-07
434	0.291835	1.75862e-07		0.292024	1.75976e-07
435	0.291646	1.70043e-07		0.291835	1.70153e-07
436	0.291458	1.64417e-07		0.291646	1.64523e-07
437	0.29127	1.58977e-07		0.291458	1.5908e-07
438	0.291083	1.53718e-07		0.29127	1.53817e-07
439	0.290896	1.48632e-07		0.291083	1.48728e-07
440	0.290709	1.43715e-07		0.290896	1.43807e-07
441	0.290523	1.38961e-07		0.290709	1.3905e-07
442	0.290338	1.34364e-07		0.290523	1.3445e-07
443	0.290153	1.2992e-07		0.290338	1.30003e-07
444	0.289968	1.25623e-07		0.290153	1.25703e-07
445	0.289784	1.21468e-07		0.289968	1.21545e-07
446	0.289601	1.1745e-07		0.289784	1.17525e-07
447	0.289418	1.13566e-07		0.289601	1.13638e-07
448	0.289235	1.0981e-07		0.289418	1.09879e-07
449	0.289053	1.06178e-07		0.289235	1.06245e-07
450	0.288871	1.02667e-07		0.289053	1.02732e-07
451	0.28869	9.9272e-08		0.288871	9.93343e-08
452	0.288509	9.59893e-08		0.28869	9.60494e-08
453	0.288329	9.28153e-08		0.288509	9.28733e-08
454	0.288149	8.97463e-08		0.288329	8.98024e-08
455	0.287969	8.6779e-08		0.288149	8.6833e-08
456	0.28779	8.39098e-08		0.287969	8.3962e-08
457	0.287612	8.11356e-08		0.28779	8.1186e-08
458	0.287434	7.84532e-08		0.287612	7.85018e-08
459	0.287256	7.58596e-08		0.287434	7.59065e-08
460	0.287079	7.33518e-08		0.287256	7.33971e-08
461	0.286902	7.0927e-08		0.287079	7.09707e-08
462	0.286726	6.85825e-08		0.286902	6.86246e-08
463	0.28655	6.63155e-08		0.286726	6.63562e-08
464	0.286375	6.41235e-08		0.28655	6.41628e-08
465	0.2862	6.20041e-08		0.286375	6.2042e-08
466	0.286025	5.99548e-08		0.2862	5.99914e-08
467	0.285851	5.79733e-08		0.286025	5.80086e-08
468	0.285678	5.60573e-08		0.285851	5.60914e-08
469	0.285504	5.42047e-08		0.285678	5.42376e-08
470	0.285332	5.24134e-08		0.285504	5.24452e-08
471	0.285159	5.06814e-08		0.285332	5.0712e-08
472	0.284988	4.90066e-08		0.285159	4.90362e-08
473	0.284816	4.73873e-08		0.284988	4.74158e-08
474	0.284645	4.58215e-08		0.284816	4.5849e-08
475	0.284475	4.43075e-08		0.284645	4.43341e-08
476	0.284304	4.28436e-08		0.284475	4.28692e-08
477	0.284135	4.14281e-08		0.284304	4.14528e-08
478	0.283965	4.00594e-08		0.284135	4.00833e-08
479	0.283797	3.8736e-08		0.283965	3.8759e-08
480	0.283628	3.74563e-08		0.283797	3.74785e-08
481	0.28346	3.6219e-08		0.283628	3.62404e-08
482	0.283293	3.50225e-08		0.28346	3.50432e-08
483	0.283126	3.38656e-08		0.283293	3.38856e-08
484	0.282959	3.2747e-08		0.283126	3.27663e-08
485	0.282793	3.16654e-08		0.282959	3.1684e-08
486	0.282627	3.06195e-08		0.282793	3.06375e-08
487	0.282461	2.96082e-08		0.282627	2.96256e-08
488	0.282296	2.86304e-08		0.282461	2.86471e-08
489	0.282132	2.76848e-08		0.282296	2.7701e-08
490	0.281968	2.67706e-08		0.282132	2.67861e-08
491	0.281804	2.58865e-08		0.281968	2.59015e-08
492	0.28164	2.50317e-08		0.281804	2.50462e-08
493	0.281477	2.42051e-08		0.28164	2.42191e-08
494	0.281315	2.34058e-08		0.281477	2.34194e-08
495	0.281153	2.2633e-08		0.281315	2.2646e-08
496	0.280991	2.18857e-08		0.281153	2.18983e-08
497	0.28083	2.11631e-08		0.280991	2.11753e-08
498	0.280669	2.04644e-08		0.28083	2.04761e-08
499	0.280508	1.97888e-08		0.280669	1.98001e-08
500	0.280348	1.91355e-08		0.280508	1.91464e-08
501	0.280189	1.85038e-08		0.280348	1.85143e-08
502	0.280029	1.78929e-08		0.280189	1.79031e-08
503	0.279871	1.73023e-08		0.280029	1.73121e-08
504	0.279712	1.67311e-08		0.279871	1.67406e-08
505	0.279554	1.61789e-08		0.279712	1.6188e-08
506	0.279396	1.56449e-08		0.279554	1.56537e-08
507	0.279239	1.51285e-08		0.279396	1.5137e-08
508	0.279082	1.46292e-08		0.279239	1.46374e-08
509	0.278926	1.41464e-08		0.279082	1.41543e-08
510	0.27877	1.36795e-08		0.278926	1.36871e-08
511	0.278614	1.3228e-08		0.27877	1.32354e-08
512	0.278459	1.27915e-08		0.278614	1.27986e-08
513	0.278304	1.23694e-08		0.278459	1.23763e-08
514	0.27815	1.19612e-08		0.278304	1.19679e-08
515	0.277995	1.15665e-08		0.27815	1.15729e-08
516	0.277842	1.11849e-08		0.277995	1.11911e-08
517	0.277688	1.08158e-08		0.277842	1.08218e-08
518	0.277536	1.0459e-08		0.277688	1.04647e-08
519	0.277383	1.01139e-08		0.277536	1.01195e-08
520	0.277231	9.78021e-09		0.277383	9.78558e-09
521	0.277079	9.45755e-09		0.277231	9.46273e-09
522	0.276928	9.14555e-09		0.277079	9.15054e-09
523	0.276777	8.84384e-09		0.276928	8.84867e-09
524	0.276626	8.5521e-09		0.276777	8.55676e-09
525	0.276476	8.26999e-09		0.276626	8.27449e-09
526	0.276326	7.9972e-09		0.276476	8.00154e-09
527	0.276176	7.73342e-09		0.276326	7.7376e-09
528	0.276027	7.47834e-09		0.276176	7.48238e-09
529	0.275879	7.23168e-09		0.276027	7.23558e-09
530	0.27573	6.99317e-09		0.275879	6.99693e-09
531	0.275582	6.76253e-09		0.27573	6.76616e-09
532	0.275435	6.5395e-09		0.275582	6.54301e-09
533	0.275288	6.32384e-09		0.275435	6.32722e-09
534	0.275141	6.1153e-09		0.275288	6.11856e-09
535	0.274994	5.91364e-09		0.275141	5.91678e-09
536	0.274848	5.71863e-09		0.274994	5.72167e-09
537	0.274702	5.53006e-09		0.274848	5.533e-09
538	0.274557	5.34772e-09		0.274702	5.35055e-09
539	0.274412	5.17139e-09		0.274557	5.17412e-09
540	0.274267	5.00088e-09		0.274412	5.00352e-09
541	0.274123	4.836e-09		0.274267	4.83855e-09
542	0.273979	4.67656e-09		0.274123	4.67902e-09
543	0.273836	4.52238e-09		0.273979	4.52475e-09
544	0.273693	4.37329e-09		0.273836	4.37558e-09
545	0.27355	4.22912e-09		0.273693	4.23133e-09
546	0.273407	4.08971e-09		0.27355	4.09184e-09
547	0.273265	3.95489e-09		0.273407	3.95695e-09
548	0.273124	3.82453e-09		0.273265	3.82651e-09
549	0.272982	3.69846e-09		0.273124	3.70038e-09
550	0.272841	3.57656e-09		0.272982	3.5784e-09
551	0.272701	3.45867e-09		0.272841	3.46046e-09
552	0.27256	3.34468e-09		0.272701	3.3464e-09
553	0.27242	3.23444e-09		0.27256	3.2361e-09
554	0.272281	3.12784e-09		0.27242	3.12945e-09
555	0.272141	3.02476e-09		0.272281	3.02631e-09
556	0.272003	2.92508e-09		0.272141	2.92657e-09
557	0.271864	2.82869e-09		0.272003	2.83013e-09
558	0.271726	2.73547e-09		0.271864	2.73686e-09
559	0.271588	2.64533e-09		0.271726	2.64668e-09
560	0.271451	2.55817e-09		0.271588	2.55946e-09
561	0.271313	2.47387e-09		0.271451	2.47512e-09
562	0.271177	2.39236e-09		0.271313	2.39357e-09
563	0.27104	2.31354e-09		0.271177	2.3147e-09
564	0.270904	2.23731e-09		0.27104	2.23844e-09
565	0.270768	2.1636e-09		0.270904	2.16469e-09
566	0.270633	2.09232e-09		0.270768	2.09337e-09
567	0.270498	2.02339e-09		0.270633	2.0244e-09
568	0.270363	1.95673e-09		0.270498	1.95771e-09
569	0.270229	1.89228e-09		0.270363	1.89322e-09
570	0.270095	1.82994e-09		0.270229	1.83085e-09
571	0.269961	1.76966e-09		0.270095	1.77054e-09
572	0.269828	1.71137e-09		0.269961	1.71222e-09
573	0.269695	1.655e-09		0.269828	1.65582e-09
574	0.269562	1.60049e-09		0.269695	1.60128e-09
575	0.26943	1.54777e-09		0.269562	1.54854e-09
576	0.269298	1.4968e-09		0.26943	1.49753e-09
577	0.269166	1.4475e-09		0.269298	1.44821e-09
578	0.269035	1.39983e-09		0.269166	1.40051e-09
579	0.268904	1.35373e-09		0.269035	1.35439e-09
580	0.268773	1.30915e-09		0.268904	1.30979e-09
581	0.268643	1.26604e-09		0.268773	1.26665e-09
582	0.268513	1.22435e-09		0.268643	1.22494e-09
583	0.268383	1.18403e-09		0.268513	1.1846e-09
584	0.268254	1.14504e-09		0.268383	1.1456e-09
585	0.268125	1.10734e-09		0.268254	1.10787e-09
586	0.267996	1.07088e-09		0.268125	1.0714e-09
587	0.267868	1.03562e-09		0.267996	1.03612e-09
588	0.267739	1.00153e-09		0.267868	1.00201e-09
589	0.267612	9.68553e-10		0.267739	9.69015e-10
590	0.267484	9.36666e-10		0.267612	9.37112e-10
591	0.267357	9.0583e-10		0.267484	9.06261e-10
592	0.267231	8.7601e-10		0.267357	8.76426e-10
593	0.267104	8.47172e-10		0.267231	8.47573e-10
594	0.266978	8.19285e-10		0.267104	8.19672e-10
595	0.266852	7.92316e-10		0.266978	7.9269e-10
596	0.266727	7.66236e-10		0.266852	7.66597e-10
597	0.266602	7.41015e-10		0.266727	7.41363e-10
598	0.266477	7.16625e-10		0.266602	7.16961e-10
599	0.266352	6.93038e-10		0.266477	6.93362e-10
600	0.266228	6.70228e-10		0.266352	6.70541e-10
601	0.266104	6.4817e-10		0.266228	6.48472e-10
602	0.26598	6.26838e-10		0.266104	6.2713e-10
603	0.265857	6.06209e-10		0.26598	6.0649e-10
604	0.265734	5.86259e-10		0.265857	5.86531e-10
605	0.265612	5.66967e-10		0.265734	5.67229e-10
606	0.265489	5.4831e-10		0.265612	5.48562e-10
607	0.265367	5.30267e-10		0.265489	5.30511e-10
608	0.265245	5.12818e-10		0.265367	5.13054e-10
609	0.265124	4.95944e-10		0.265245	4.96171e-10
610	0.265003	4.79626e-10		0.265124	4.79845e-10
611	0.264882	4.63845e-10		0.265003	4.64057e-10
612	0.264762	4.48584e-10		0.264882	4.48788e-10
613	0.264641	4.33825e-10		0.264762	4.34022e-10
614	0.264522	4.19553e-10		0.264641	4.19743e-10
615	0.264402	4.0575e-10		0.264522	4.05933e-10
616	0.264283	3.92401e-10		0.264402	3.92579e-10
617	0.264164	3.79493e-10		0.264283	3.79664e-10
618	0.264045	3.67009e-10		0.264164	3.67174e-10
619	0.263927	3.54936e-10		0.264045	3.55095e-10
620	0.263809	3.43261e-10		0.263927	3.43414e-10
621	0.263691	3.3197e-10		0.263809	3.32118e-10
622	0.263573	3.2105e-10		0.263691	3.21193e-10
623	0.263456	3.1049e-10		0.263573	3.10629e-10
624	0.263339	3.00278e-10		0.263456	3.00411e-10
625	0.263223	2.90402e-10		0.263339	2.90531e-10
626	0.263106	2.80851e-10		0.263223	2.80975e-10
627	0.26299	2.71614e-10		0.263106	2.71734e-10
628	0.262875	2.62682e-10		0.26299	2.62797e-10
629	0.262759	2.54043e-10		0.262875	2.54155e-10
630	0.262644	2.45689e-10		0.262759	2.45797e-10
631	0.262529	2.3761e-10		0.262644	2.37714e-10
632	0.262415	2.29796e-10		0.262529	2.29896e-10
633	0.262301	2.2224e-10		0.262415	2.22337e-10
634	0.262187	2.14932e-10		0.262301	2.15026e-10
635	0.262073	2.07865e-10		0.262187	2.07955e-10
636	0.26196	2.0103e-10		0.262073	2.01117e-10
637	0.261847	1.94421e-10		0.26196	1.94505e-10
638	0.261734	1.88029e-10		0.261847	1.8811e-10
639	0.261621	1.81847e-10		0.261734	1.81925e-10
640	0.261509	1.75868e-10		0.261621	1.75944e-10
641	0.261397	1.70086e-10		0.261509	1.70159e-10
642	0.261285	1.64495e-10		0.261397	1.64565e-10
643	0.261174	1.59087e-10		0.261285	1.59155e-10
644	0.261063	1.53858e-10		0.261174	1.53923e-10
645	0.260952	1.488e-10		0.261063	1.48863e-10
646	0.260842	1.43909e-10		0.260952	1.4397e-10
647	0.260731	1.39178e-10		0.260842	1.39237e-10
648	0.260621	1.34604e-10		0.260731	1.3466e-10
649	0.260512	1.30179e-10		0.260621	1.30234e-10
650	0.260402	1.25901e-10		0.260512	1.25954e-10
651	0.260293	1.21763e-10		0.260402	1.21814e-10
652	0.260184	1.17761e-10		0.260293	1.1781e-10
653	0.260076	1.13891e-10		0.260184	1.13938e-10
654	0.259967	1.10148e-10		0.260076	1.10194e-10
655	0.259859	1.06528e-10		0.259967	1.06572e-10
656	0.259751	1.03027e-10		0.259859	1.0307e-10
657	0.259644	9.96413e-11		0.259751	9.96826e-11
658	0.259537	9.6367e-11		0.259644	9.64068e-11
659	0.25943	9.32004e-11		0.259537	9.32388e-11
660	0.259323	9.01379e-11		0.25943	9.0175e-11
661	0.259217	8.71761e-11		0.259323	8.72119e-11
662	0.25911	8.43117e-11		0.259217	8.43462e-11
663	0.259005	8.15415e-11		0.25911	8.15748e-11
664	0.258899	7.88623e-11		0.259005	7.88945e-11
665	0.258794	7.62713e-11		0.258899	7.63024e-11
666	0.258689	7.37655e-11		0.258794	7.37954e-11
667	0.258584	7.1342e-11		0.258689	7.13709e-11
668	0.258479	6.89983e-11		0.258584	6.90262e-11
669	0.258375	6.67315e-11		0.258479	6.67585e-11
670	0.258271	6.45393e-11		0.258375	6.45653e-11
671	0.258167	6.24192e-11		0.258271	6.24443e-11
672	0.258064	6.03688e-11		0.258167	6.0393e-11
673	0.25796	5.83858e-11		0.258064	5.84091e-11
674	0.257858	5.64679e-11		0.25796	5.64905e-11
675	0.257755	5.46131e-11		0.257858	5.46349e-11
676	0.257652	5.28193e-11		0.257755	5.28403e-11
677	0.25755	5.10845e-11		0.257652	5.11047e-11
678	0.257448	4.94066e-11		0.25755	4.94262e-11
679	0.257347	4.77839e-11		0.257448	4.78028e-11
680	0.257245	4.62146e-11		0.257347	4.62328e-11
681	0.257144	4.46968e-11		0.257245	4.47144e-11
682	0.257043	4.32289e-11		0.257144	4.32459e-11
683	0.256942	4.18093e-11		0.257043	4.18256e-11
684	0.256842	4.04363e-11		0.256942	4.04521e-11
685	0.256742	3.91084e-11		0.256842	3.91237e-11
686	0.256642	3.78242e-11		0.256742	3.78389e-11
687	0.256542	3.65821e-11		0.256642	3.65963e-11
688	0.256443	3.53809e-11		0.256542	3.53946e-11
689	0.256344	3.42192e-11		0.256443	3.42324e-11
690	0.256245	3.30956e-11		0.256344	3.31084e-11
691	0.256146	3.20089e-11		0.256245	3.20213e-11
692	0.256048	3.0958e-11		0.256146	3.09699e-11
693	0.25595	2.99416e-11		0.256048	2.99531e-11
694	0.255852	2.89585e-11		0.25595	2.89696e-11
695	0.255754	2.80078e-11		0.255852	2.80185e-11
696	0.255657	2.70883e-11		0.255754	2.70986e-11
697	0.25556	2.6199e-11		0.255657	2.6209e-11
698	0.255463	2.5339e-11		0.25556	2.53486e-11
699	0.255366	2.45072e-11		0.255463	2.45164e-11
700	0.25527	2.37027e-11		0.255366	2.37116e-11
701	0.255174	2.29246e-11		0.25527	2.29333e-11
702	0.255078	2.21721e-11		0.255174	2.21804e-11
703	0.254982	2.14443e-11		0.255078	2.14524e-11
704	0.254887	2.07404e-11		0.254982	2.07482e-11
705	0.254792	2.00597e-11		0.254887	2.00672e-11
706	0.254697	1.94013e-11		0.254792	1.94085e-11
707	0.254602	1.87645e-11		0.254697	1.87715e-11
708	0.254508	1.81487e-11		0.254602	1.81554e-11
709	0.254413	1.7553e-11		0.254508	1.75595e-11
710	0.254319	1.6977e-11		0.254413	1.69832e-11
711	0.254226	1.64198e-11		0.254319	1.64259e-11
712	0.254132	1.5881e-11		0.254226	1.58868e-11
713	0.254039	1.53598e-11		0.254132	1.53654e-11
714	0.253946	1.48558e-11		0.254039	1.48612e-11
715	0.253853	1.43683e-11		0.253946	1.43735e-11
716	0.253761	1.38968e-11		0.253853	1.39018e-11
717	0.253668	1.34408e-11		0.253761	1.34457e-11
718	0.253576	1.29997e-11		0.253668	1.30045e-11
719	0.253484	1.25732e-11		0.253576	1.25778e-11
720	0.253393	1.21607e-11		0.253484	1.21651e-11
721	0.253301	1.17617e-11		0.253393	1.17659e-11
722	0.25321	1.13758e-11		0.253301	1.13799e-11
723	0.253119	1.10025e-11		0.25321	1.10065e-11
724	0.253028	1.06416e-11		0.253119	1.06454e-11
725	0.252938	1.02924e-11		0.253028	1.02961e-11
726	0.252848	9.95478e-12		0.252938	9.95834e-12
727	0.252758	9.62821e-12		0.252848	9.63164e-12
728	0.252668	9.31235e-12		0.252758	9.31566e-12
729	0.252578	9.00687e-12		0.252668	9.01006e-12
730	0.252489	8.71141e-12		0.252578	8.71449e-12
731	0.2524	8.42565e-12		0.252489	8.42862e-12
732	0.252311	8.14927e-12		0.2524	8.15214e-12
733	0.252222	7.88196e-12		0.252311	7.88473e-12
734	0.252134	7.62343e-12		0.252222	7.6261e-12
735	0.252046	7.37338e-12		0.252134	7.37596e-12
736	0.251958	7.13154e-12		0.252046	7.13403e-12
737	0.25187	6.89764e-12		0.251958	6.90004e-12
738	0.251782	6.67141e-12		0.25187	6.67373e-12
739	0.251695	6.45261e-12		0.251782	6.45485e-12
740	0.251608	6.24099e-12		0.251695	6.24315e-12
741	0.251521	6.03631e-12		0.251608	6.03839e-12
742	0.251434	5.83835e-12		0.251521	5.84036e-12
743	0.251348	5.64689e-12		0.251434	5.64883e-12
744	0.251262	5.46171e-12		0.251348	5.46358e-12
745	0.251176	5.2826e-12		0.251262	5.28441e-12
746	0.25109	5.10938e-12		0.251176	5.11112e-12
747	0.251004	4.94183e-12		0.25109	4.94352e-12
748	0.250919	4.77979e-12		0.251004	4.78141e-12
749	0.250834	4.62306e-12		0.250919	4.62463e-12
750	0.250749	4.47148e-12		0.250834	4.47299e-12
751	0.250664	4.32486e-12		0.250749	4.32633e-12
752	0.25058	4.18306e-12		0.250664	4.18447e-12
753	0.250496	4.04591e-12		0.25058	4.04727e-12
754	0.250412	3.91326e-12		0.250496	3.91458e-12
755	0.250328	3.78496e-12		0.250412	3.78623e-12
756	0.250244	3.66088e-12		0.250328	3.6621e-12
757	0.250161	3.54086e-12		0.250244	3.54204e-12
758	0.250077	3.42478e-12		0.250161	3.42592e-12
759	0.249994	3.3125e-12		0.250077	3.3136e-12
760	0.249912	3.20391e-12		0.249994	3.20498e-12
761	0.249829	3.09889e-12		0.249912	3.09991e-12
762	0.249747	2.9973e-12		0.249829	2.99829e-12
763	0.249664	2.89905e-12		0.249747	2.90001e-12
764	0.249583	2.80402e-12		0.249664	2.80494e-12
765	0.249501	2.71211e-12		0.249583	2.713e-12
766	0.249419	2.62322e-12		0.249501	2.62407e-12
767	0.249338	2.53723e-12		0.249419	2.53806e-12
768	0.249257	2.45407e-12		0.249338	2.45487e-12
769	0.249176	2.37364e-12		0.249257	2.37441e-12
770	0.249095	2.29584e-12		0.249176	2.29659e-12
771	0.249015	2.2206e-12		0.249095	2.22132e-12
772	0.248934	2.14782e-12		0.249015	2.14852e-12
773	0.248854	2.07743e-12		0.248934	2.0781e-12
774	0.248774	2.00935e-12		0.248854	2.01e-12
775	0.248695	1.9435e-12		0.248774	1.94412e-12
776	0.248615	1.87981e-12		0.248695	1.88041e-12
777	0.248536	1.81821e-12		0.248615	1.81879e-12
778	0.248457	1.75863e-12		0.248536	1.75919e-12
779	0.248378	1.701e-12		0.248457	1.70154e-12
780	0.248299	1.64526e-12		0.248378	1.64578e-12
781	0.248221	1.59135e-12		0.248299	1.59185e-12
782	0.248142	1.53921e-12		0.248221	1.53969e-12
783	0.248064	1.48877e-12		0.248142	1.48924e-12
784	0.247986	1.43999e-12		0.248064	1.44045e-12
785	0.247909	1.39281e-12		0.247986	1.39325e-12
786	0.247831	1.34718e-12		0.247909	1.3476e-12
787	0.247754	1.30304e-12		0.247831	1.30345e-12
788	0.247677	1.26035e-12		0.247754	1.26074e-12
789	0.2476	1.21906e-12		0.247677	1.21944e-12
790	0.247523	1.17912e-12		0.2476	1.17949e-12
791	0.247446	1.14049e-12		0.247523	1.14085e-12
792	0.24737	1.10313e-12		0.247446	1.10347e-12
793	0.247294	1.06699e-12		0.24737	1.06732e-12
794	0.247218	1.03204e-12		0.247294	1.03236e-12
795	0.247142	9.98232e-13		0.247218	9.98538e-13
796	0.247067	9.65532e-13		0.247142	9.65828e-13
797	0.246991	9.33905e-13		0.247067	9.3419e-13
798	0.246916	9.03314e-13		0.246991	9.03589e-13
799	0.246841	8.73725e-13		0.246916	8.73991e-13
800	0.246766	8.45107e-13		0.246841	8.45363e-13
801	0.246692	8.17426e-13		0.246766	8.17673e-13
802	0.246617	7.90653e-13		0.246692	7.90891e-13
803	0.246543	7.64757e-13		0.246617	7.64987e-13
804	0.246469	7.39709e-13		0.246543	7.39932e-13
805	0.246395	7.15483e-13		0.246469	7.15697e-13
806	0.246321	6.9205e-13		0.246395	6.92257e-13
807	0.246248	6.69386e-13		0.246321	6.69585e-13
808	0.246175	6.47463e-13		0.246248	6.47656e-13
809	0.246102	6.2626e-13		0.246175	6.26446e-13
810	0.246029	6.05751e-13		0.246102	6.05931e-13
811	0.245956	5.85914e-13		0.246029	5.86087e-13
812	0.245883	5.66727e-13		0.245956	5.66894e-13
813	0.245811	5.48169e-13		0.245883	5.4833e-13
814	0.245739	5.30219e-13		0.245811	5.30375e-13
815	0.245667	5.12857e-13		0.245739	5.13007e-13
816	0.245595	4.96064e-13		0.245667	4.96209e-13
817	0.245523	4.79821e-13		0.245595	4.79961e-13
818	0.245452	4.6411e-13		0.245523	4.64245e-13
819	0.24538	4.48914e-13		0.245452	4.49044e-13
820	0.245309	4.34216e-13		0.24538	4.34341e-13
821	0.245238	4.19999e-13		0.245309	4.2012e-13
822	0.245168	4.06248e-13		0.245238	4.06365e-13
823	0.245097	3.92947e-13		0.245168	3.9306e-13
824	0.245027	3.80083e-13		0.245097	3.80192e-13
825	0.244957	3.67639e-13		0.245027	3.67744e-13
826	0.244886	3.55603e-13		0.244957	3.55705e-13
827	0.244817	3.43962e-13		0.244886	3.4406e-13
828	0.244747	3.32702e-13		0.244817	3.32796e-13
829	0.244677	3.2181e-13		0.244747	3.21902e-13
830	0.244608	3.11276e-13		0.244677	3.11364e-13
831	0.244539	3.01086e-13		0.244608	3.01171e-13
832	0.24447	2.9123e-13		0.244539	2.91312e-13
833	0.244401	2.81697e-13		0.24447	2.81776e-13
834	0.244333	2.72476e-13		0.244401	2.72553e-13
835	0.244264	2.63557e-13		0.244333	2.63631e-13
836	0.244196	2.54931e-13		0.244264	2.55002e-13
837	0.244128	2.46586e-13		0.244196	2.46655e-13
838	0.24406	2.38515e-13		0.244128	2.38582e-13
839	0.243992	2.30709e-13		0.24406	2.30773e-13
840	0.243924	2.23158e-13		0.243992	2.2322e-13
841	0.243857	2.15854e-13		0.243924	2.15914e-13
842	0.24379	2.0879e-13		0.243857	2.08847e-13
843	0.243723	2.01956e-13		0.24379	2.02012e-13
844	0.243656	1.95347e-13		0.243723	1.95401e-13
845	0.243589	1.88954e-13		0.243656	1.89006e-13
846	0.243522	1.8277e-13		0.243589	1.8282e-13
847	0.243456	1.76789e-13		0.243522	1.76837e-13
848	0.24339	1.71004e-13		0.243456	1.7105e-13
849	0.243324	1.65408e-13		0.24339	1.65453e-13
850	0.243258	1.59995e-13		0.243324	1.60038e-13
851	0.243192	1.5476e-13		0.243258	1.54801e-13
852	0.243127	1.49695e-13		0.243192	1.49736e-13
853	0.243061	1.44797e-13		0.243127	1.44836e-13
854	0.242996	1.40059e-13		0.243061	1.40097e-13
855	0.242931	1.35476e-13		0.242996	1.35513e-13
856	0.242866	1.31044e-13		0.242931	1.31079e-13
857	0.242801	1.26756e-13		0.242866	1.2679e-13
858	0.242737	1.22609e-13		0.242801	1.22641e-13
859	0.242672	1.18597e-13		0.242737	1.18629e-13
860	0.242608	1.14717e-13		0.242672	1.14747e-13
861	0.242544	1.10964e-13		0.242608	1.10993e-13
862	0.24248	1.07333e-13		0.242544	1.07362e-13
863	0.242416	1.03822e-13		0.24248	1.03849e-13
864	0.242353	1.00425e-13		0.242416	1.00452e-13
865	0.242289	9.714e-14		0.242353	9.71654e-14
866	0.242226	9.39621e-14		0.242289	9.39867e-14
867	0.242163	9.08883e-14		0.242226	9.0912e-14
868	0.2421	8.79151e-14		0.242163	8.79379e-14
869	0.242037	8.50391e-14		0.2421	8.50612e-14
870	0.241974	8.22574e-14		0.242037	8.22786e-14
871	0.241912	7.95666e-14		0.241974	7.95872e-14
872	0.24185	7.69639e-14		0.241912	7.69838e-14
873	0.241787	7.44464e-14		0.24185	7.44656e-14
874	0.241725	7.20113e-14		0.241787	7.20298e-14
875	0.241664	6.96559e-14		0.241725	6.96737e-14
876	0.241602	6.73776e-14		0.241664	6.73948e-14
877	0.24154	6.51738e-14		0.241602	6.51904e-14
878	0.241479	6.30421e-14		0.24154	6.30582e-14
879	0.241418	6.09802e-14		0.241479	6.09957e-14
880	0.241357	5.89858e-14		0.241418	5.90007e-14
881	0.241296	5.70566e-14		0.241357	5.7071e-14
882	0.241235	5.51906e-14		0.241296	5.52045e-14
883	0.241174	5.33856e-14		0.241235	5.3399e-14
884	0.241114	5.16397e-14		0.241174	5.16526e-14
885	0.241054	4.99509e-14		0.241114	4.99634e-14
886	0.240993	4.83173e-14		0.241054	4.83294e-14
887	0.240933	4.67373e-14		0.240993	4.67489e-14
888	0.240874	4.52089e-14		0.240933	4.52201e-14
889	0.240814	4.37305e-14		0.240874	4.37413e-14
890	0.240754	4.23005e-14		0.240814	4.23109e-14
891	0.240695	4.09172e-14		0.240754	4.09273e-14
892	0.240636	3.95793e-14		0.240695	3.9589e-14
893	0.240577	3.82851e-14		0.240636	3.82945e-14
894	0.240518	3.70332e-14		0.240577	3.70423e-14
895	0.240459	3.58223e-14		0.240518	3.5831e-14
896	0.2404	3.4651e-14		0.240459	3.46594e-14
897	0.240342	3.3518e-14		0.2404	3.35262e-14
898	0.240283	3.24221e-14		0.240342	3.243e-14
899	0.240225	3.1362e-14		0.240283	3.13696e-14
900	0.240167	3.03366e-14		0.240225	3.0344e-14
901	0.240109	2.93448e-14		0.240167	2.93519e-14
902	0.240051	2.83854e-14		0.240109	2.83922e-14
903	0.239994	2.74574e-14		0.240051	2.7464e-14
904	0.239936	2.65597e-14		0.239994	2.65661e-14
905	0.239879	2.56914e-14		0.239936	2.56975e-14
906	0.239822	2.48515e-14		0.239879	2.48574e-14
907	0.239765	2.40391e-14		0.239822	2.40448e-14
908	0.239708	2.32532e-14		0.239765	2.32587e-14
909	0.239651	2.2493e-14		0.239708	2.24984e-14
910	0.239595	2.17577e-14		0.239651	2.17629e-14
911	0.239538	2.10465e-14		0.239595	2.10514e-14
912	0.239482	2.03585e-14		0.239538	2.03633e-14
913	0.239426	1.9693e-14		0.239482	1.96976e-14
914	0.23937	1.90493e-14		0.239426	1.90538e-14
915	0.239314	1.84266e-14		0.23937	1.84309e-14
916	0.239258	1.78243e-14		0.239314	1.78285e-14
917	0.239202	1.72417e-14		0.239258	1.72457e-14
918	0.239147	1.66781e-14		0.239202	1.6682e-14
919	0.239092	1.6133e-14		0.239147	1.61367e-14
920	0.239036	1.56057e-14		0.239092	1.56093e-14
921	0.238981	1.50957e-14		0.239036	1.50991e-14
922	0.238926	1.46023e-14		0.238981	1.46056e-14
923	0.238872	1.4125e-14		0.238926	1.41283e-14
924	0.238817	1.36634e-14		0.238872	1.36665e-14
925	0.238763	1.32168e-14		0.238817	1.32198e-14
926	0.238708	1.27849e-14		0.238763	1.27878e-14
927	0.238654	1.23671e-14		0.238708	1.23699e-14
928	0.2386	1.19629e-14		0.238654	1.19656e-14
929	0.238546	1.15719e-14		0.2386	1.15746e-14
930	0.238492	1.11938e-14		0.238546	1.11963e-14
931	0.238439	1.0828e-14		0.238492	1.08304e-14
932	0.238385	1.04741e-14		0.238439	1.04765e-14
933	0.238332	1.01319e-14		0.238385	1.01341e-14
934	0.238278	9.80077e-15		0.238332	9.80296e-15
935	0.238225	9.48051e-15		0.238278	9.48262e-15
936	0.238172	9.17072e-15		0.238225	9.17276e-15
937	0.238119	8.87105e-15		0.238172	8.87302e-15
938	0.238067	8.58118e-15		0.238119	8.58308e-15
939	0.238014	8.30079e-15		0.238067	8.30263e-15
940	0.237962	8.02957e-15		0.238014	8.03134e-15
941	0.237909	7.76721e-15		0.237962	7.76892e-15
942	0.237857	7.51342e-15		0.237909	7.51507e-15
943	0.237805	7.26794e-15		0.237857	7.26953e-15
944	0.237753	7.03047e-15		0.237805	7.03201e-15
945	0.237701	6.80077e-15		0.237753	6.80225e-15
946	0.23765	6.57858e-15		0.237701	6.58001e-15
947	0.237598	6.36365e-15		0.23765	6.36503e-15
948	0.237547	6.15574e-15		0.237598	6.15708e-15
949	0.237495	5.95463e-15		0.237547	5.95592e-15
950	0.237444	5.7601e-15		0.237495	5.76134e-15
951	0.237393	5.57192e-15		0.237444	5.57312e-15
952	0.237342	5.38989e-15		0.237393	5.39105e-15
953	0.237292	5.21381e-15		0.237342	5.21493e-15
954	0.237241	5.04349e-15		0.237292	5.04456e-15
955	0.237191	4.87873e-15		0.237241	4.87977e-15
956	0.23714	4.71936e-15		0.237191	4.72036e-15
957	0.23709	4.56519e-15		0.23714	4.56616e-15
958	0.23704	4.41607e-15		0.23709	4.417e-15
959	0.23699	4.27181e-15		0.23704	4.27271e-15
960	0.23694	4.13228e-15		0.23699	4.13314e-15
961	0.23689	3.9973e-15		0.23694	3.99814e-15
962	0.236841	3.86673e-15		0.23689	3.86754e-15
963	0.236791	3.74043e-15		0.236841	3.74121e-15
964	0.236742	3.61825e-15		0.236791	3.61901e-15
965	0.236693	3.50007e-15		0.236742	3.5008e-15
966	0.236643	3.38575e-15		0.236693	3.38645e-15
967	0.236595	3.27517e-15		0.236643	3.27585e-15
968	0.236546	3.1682e-15		0.236595	3.16885e-15
969	0.236497	3.06472e-15		0.236546	3.06535e-15
970	0.236448	2.96463e-15		0.236497	2.96523e-15
971	0.2364	2.8678e-15		0.236448	2.86839e-15
972	0.236351	2.77414e-15		0.2364	2.77471e-15
973	0.236303	2.68354e-15		0.236351	2.68409e-15
974	0.236255	2.5959e-15		0.236303	2.59643e-15
975	0.236207	2.51112e-15		0.236255	2.51163e-15
976	0.236159	2.42912e-15		0.236207	2.42961e-15
977	0.236111	2.34979e-15		0.236159	2.35026e-15
978	0.236064	2.27305e-15		0.236111	2.27351e-15
979	0.236016	2.19882e-15		0.236064	2.19927e-15
980	0.235969	2.12702e-15		0.236016	2.12745e-15
981	0.235922	2.05756e-15		0.235969	2.05797e-15
982	0.235874	1.99037e-15		0.235922	1.99077e-15
983	0.235827	1.92538e-15		0.235874	1.92576e-15
984	0.235781	1.86251e-15		0.235827	1.86288e-15
985	0.235734	1.80169e-15		0.235781	1.80205e-15
986	0.235687	1.74286e-15		0.235734	1.7432e-15
987	0.23564	1.68595e-15		0.235687	1.68628e-15
988	0.235594	1.6309e-15		0.23564	1.63122e-15
989	0.235548	1.57765e-15		0.235594	1.57796e-15
990	0.235502	1.52614e-15		0.235548	1.52643e-15
991	0.235455	1.47631e-15		0.235502	1.47659e-15
992	0.235409	1.4281e-15		0.235455	1.42838e-15
993	0.235364	1.38148e-15		0.235409	1.38175e-15
994	0.235318	1.33637e-15		0.235364	1.33663e-15
995	0.235272	1.29274e-15		0.235318	1.29299e-15
996	0.235227	1.25053e-15		0.235272	1.25078e-15
997	0.235181	1.20971e-15		0.235227	1.20994e-15
998	0.235136	1.17021e-15		0.235181	1.17044e-15
999	0.235091	1.13201e-15		0.235136	1.13223e-15
1000	0.235046	1.09505e-15		0.235091	1.09526e-15
1001	0.235001	1.0593e-15		0.235046	1.0595e-15
1002	0.234956	1.02472e-15		0.235001	1.02492e-15
1003	0.234911	9.91268e-16		0.234956	9.91456e-16
1004	0.234867	9.58908e-16		0.234911	9.5909e-16
